# Supplementary material for: Dysfunctional oxidative phosphorylation shunts branched‐chain amino acid catabolism onto lipogenesis in skeletal muscle
Source: PubMed Central journal article supplement (PMC7360968; doi:10.15252/embj.2019103812), 2020-06-03
Supplement: EMBJ-39-e103812-s001.pdf [file EMBJ-39-e103812-s001.pdf]

## Expanded View Figures

### Figure EV1. Skm iTRAQ data. (Related to Fig 1).

*Upper panel.* GSEA bioinformatics analysis of the quantitative proteomic data (iTRAQ) of hindlimb Skm from wt and Low<sub>OXPHOS</sub> mice. Set to set graph of 14 significantly altered pathways is shown. 1. Hallmarks of adipogenesis; 2. Go\_Mitochondrial signal; 3. Kegg\_TCA Cycle 4; Pyruvate Metabolism Reactome; 5. Hallmarks of OXPHOS; 6. Go\_ETC; 7. Go\_NADPH metabolism; 8. Kegg\_Propionate metabolism; 9. Redox system; 10. Kegg\_BCAA catabolism; 11. Go\_Lipid metabolism; 12. Kegg\_Lipid oxidation; 13. NEFA, Tg and ketone bodies; 14. Go\_FAD-binding proteins. Size, normalized enrichment score (ES, NES) and *P*-values are reported. Color intensity indicates the overlap between subsets.

*Medium panel.* Heat maps of the iTRAQ ratio for proteins related to the TCA cycle and reductive carboxylation, glucose and pyruvate metabolism, lipid synthesis and transport, BCAA catabolism and the redox system. Higher intensities of red or blue color represent higher or lower expression ratios, respectively.

*Lower panel.* Cytoscape representation of proteomic data.

Data information: Data are representative of 12 animals/genotype.

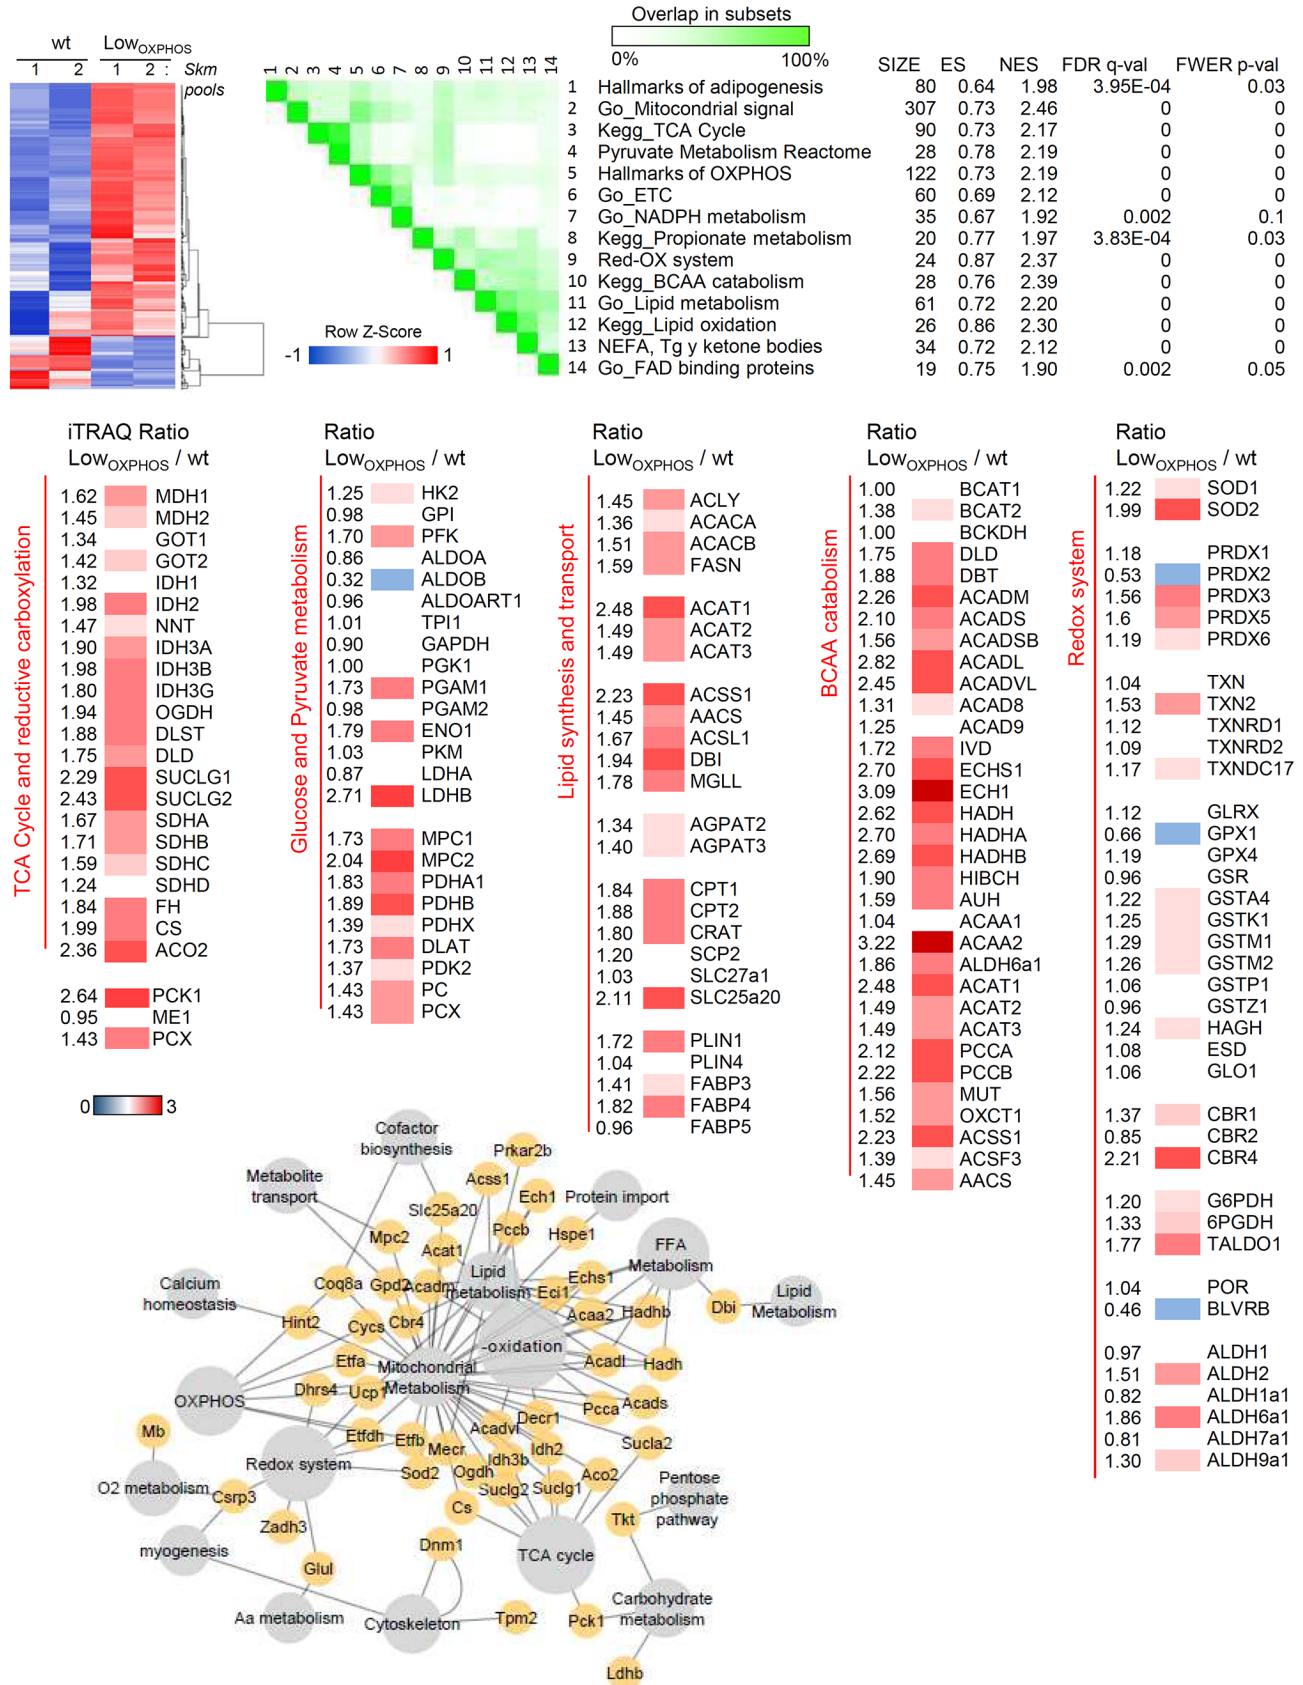

Figure EV1.

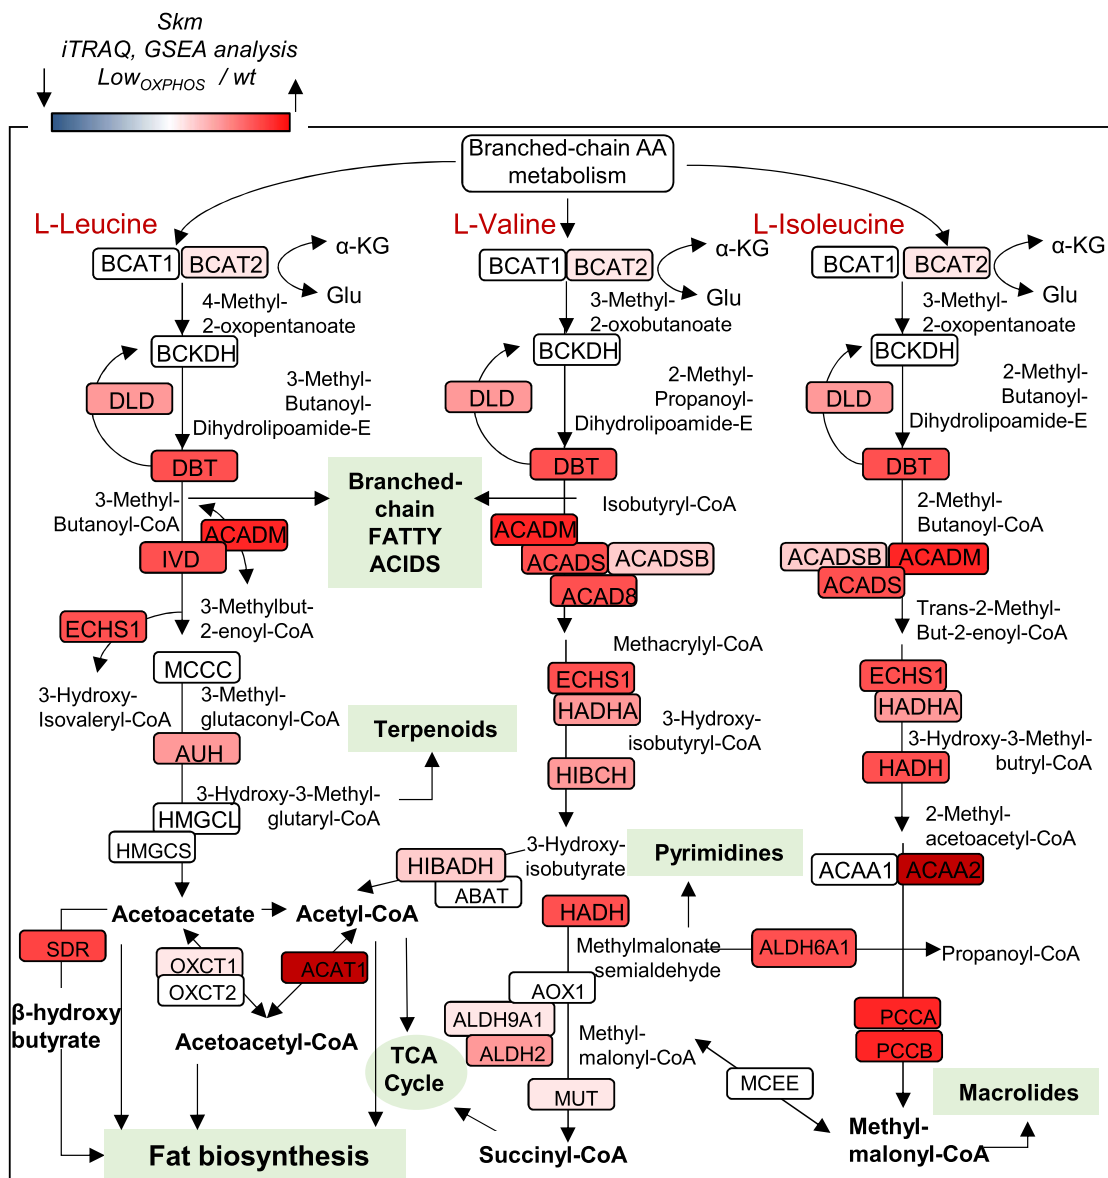

Figure EV2. GSEA analysis of Skm iTRAQ data (BCCA catabolism). (Related to Fig 1).

GSEA representation of the BCAA catabolism pathway obtained by the analysis of the iTRAQ data for hindlimb Skm from wt and *Low<sub>OXPHOS</sub>* mice. A higher intensity of red color represents a higher *Low<sub>OXPHOS</sub> / wt* expression ratio. Data are representative of 12 animals/genotype.

**Figure EV3. The ATP synthase-mediated glycolytic and lipogenic reprogramming (related to Figs 2 and 3).**

- A Representative images of wt and Low<sub>OXP</sub> mice.
- B Representative WB expression of Skm proteins related to glycolysis. LDHA levels are significantly augmented in Low<sub>OXP</sub> mice when compared to wt. Three samples *per condition* are shown. Each sample contains extracts from 3 mice. Histograms show the LDHA expression (wt, *n* = 6; Low<sub>OXP</sub>, *n* = 6).
- C ATP levels in Skm from wt and Low<sub>OXP</sub> animals (wt, *n* = 5; Low<sub>OXP</sub>, *n* = 5). No differences were observed.
- D Skm free glycerol levels (wt, *n* = 8; Low<sub>OXP</sub>, *n* = 8).
- E, F LD formation upon ATP synthase inhibition (ATPIF1<sub>H49K</sub> expression or treatment with 5 μM oligomycin) in C<sub>2</sub>C<sub>12</sub> cells after 24 h of palmitate supplementation. Blue: DAPI, nuclei; green: BODIPY-positive LDs. Images are representative of *n* = 3 experiments, 7–10 fields/condition.
- G Representative WB of Skm proteins related with autophagy and inflammation. Two samples *per condition* are shown. Each sample contains extracts from 3 mice (wt, *n* = 6; Low<sub>OXP</sub>, *n* = 6).
- H Representative WB of proteins related with autophagy in C<sub>2</sub>C<sub>12</sub> myocytes expressing or not ATPIF1<sub>H49K</sub> in the presence or absence of BCAA. No difference where observed. Two samples *per condition* are shown. *n* = 3 experiments, 6 replicates/condition.
- I Blood glucose levels after 60 days of doxycycline administration in wt (black bars) and Low<sub>OXP</sub> (orange bars) mice. No differences were detected between the two genotypes. (wt, *n* = 12; Low<sub>OXP</sub>, *n* = 12).
- J Insulin (ITT) and glucose (GTT) tolerance tests at day 60 of chow diet (wt, *n* = 12; Low<sub>OXP</sub>, *n* = 12).
- K *Upper panel.* Open field representative track plots of wt and Low<sub>OXP</sub> mice when treated or not with edaravone and fed with HFD. No differences were observed. *Lower panel.* Open field results. Total distance (m), mean speed (m/s), max. speed (m/s), time mobile (s), relative time in the center zone (%) and relative time in the corners (%) of wt (black bars, *n* = 4), wt + edaravone (light green, *n* = 4), Low<sub>OXP</sub> (orange, *n* = 4) and Low<sub>OXP</sub> + edaravone (dark green, *n* = 4) are shown.

Data information: Bars are the mean ± SEM of indicated (*n*) mice. \**P* < 0.05 when compared to wt by Student's *t*-test. Source data are available online for this figure.

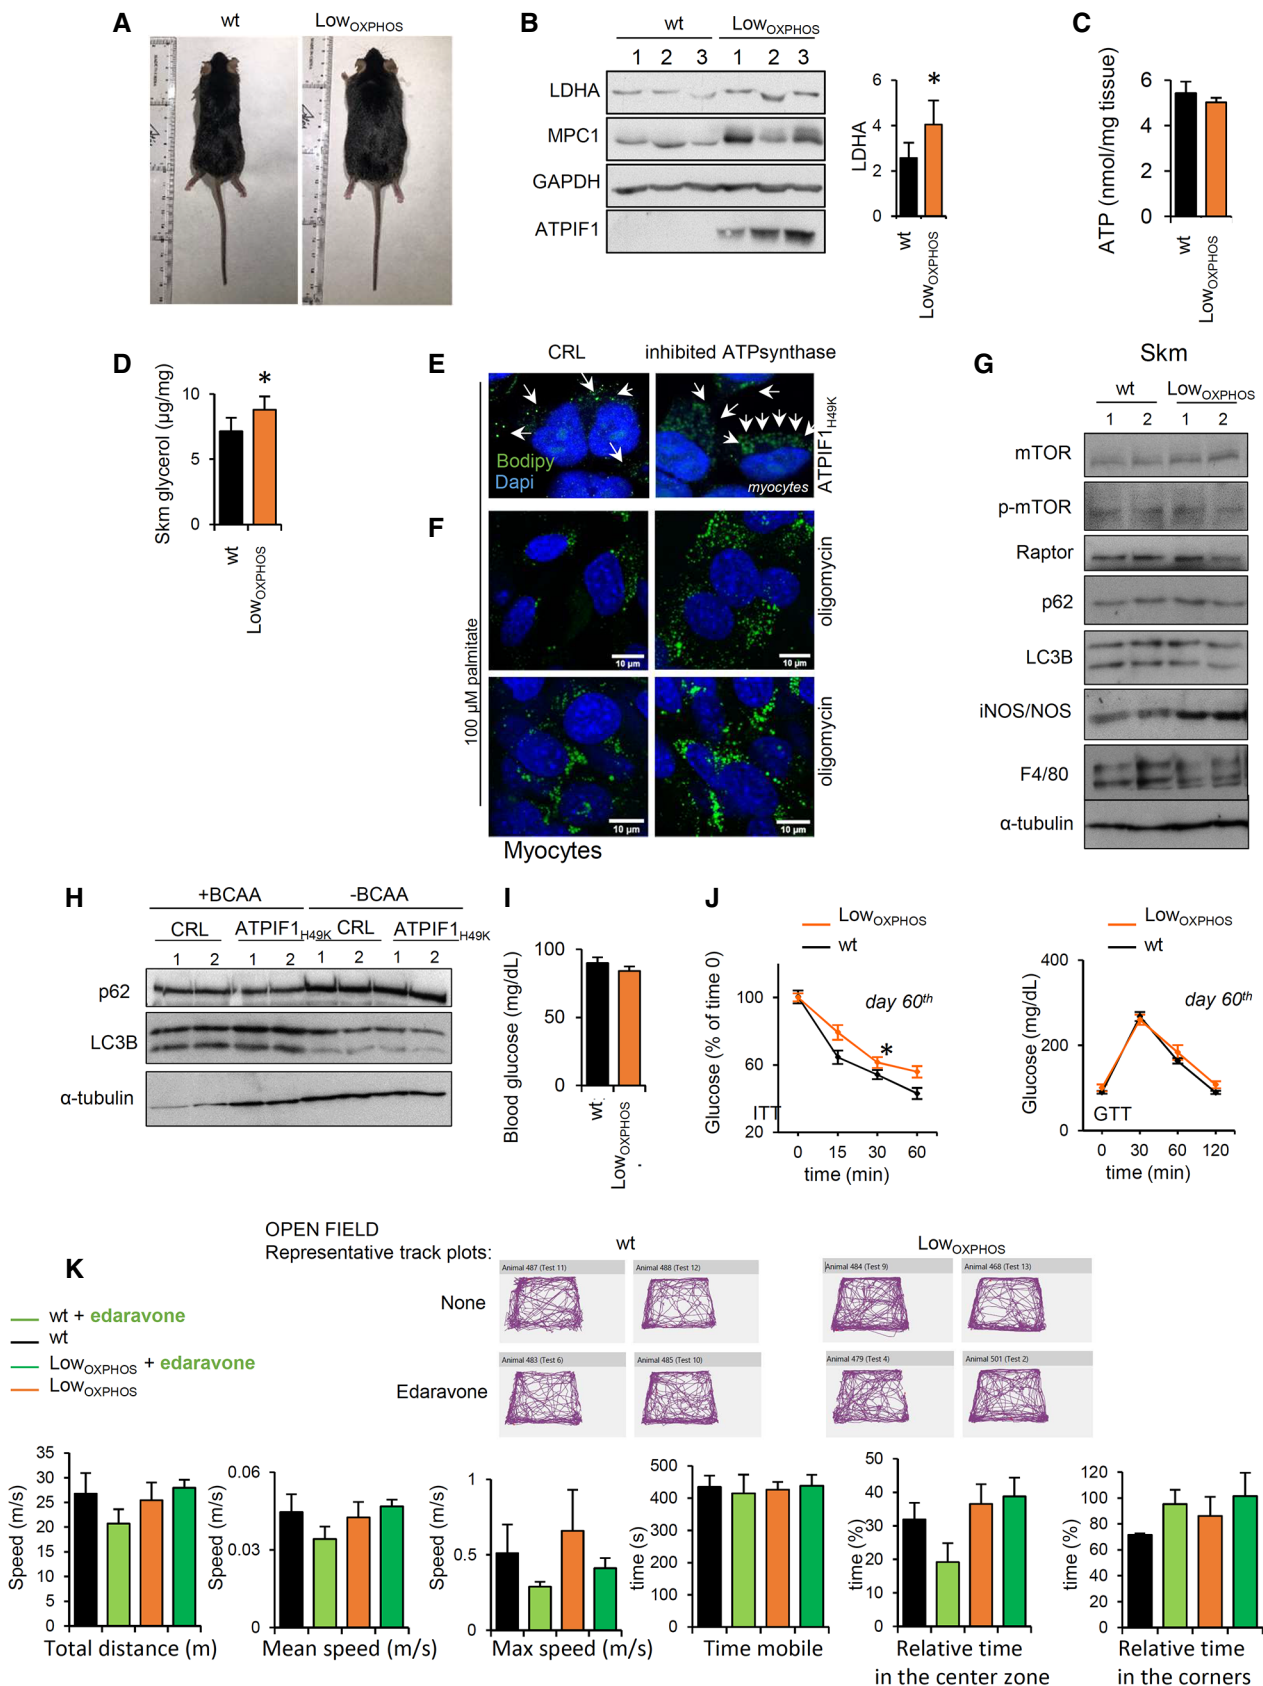

Figure EV3.

**Figure EV4. HFD-dependent alterations in lipid storages and species (related to Figs 3 and 4).**

- A Weight gained (g/15 days) and mouse body weight following the administration of HFD in wt (black bars and traces,  $n = 10$ ) and Low<sub>OXPHOS</sub> (orange bars and traces,  $n = 10$ ) mice.
- B Food intake (g HFD/mouse/day) in wt ( $n = 5$ ) and Low<sub>OXPHOS</sub> ( $n = 4$ ) animals. No differences were observed.
- C Representative images of v-WAT in wt and Low<sub>OXPHOS</sub> mice and total lipids (nmol/mg tissue) in v-WAT from wt ( $n = 8$ ) and Low<sub>OXPHOS</sub> ( $n = 8$ ) animals.
- D, E Heat maps of the quantitative lipidomics for TAGs and DAGs species in Skm from wt ( $n = 8$ ) and Low<sub>OXPHOS</sub> ( $n = 8$ ) mice. The color scale (yellow to blue) in the heat map represents the z-score.
- F, G WAT saturated DAG (nmol/mg tissue, F) and Skm number of saturated lipid species (G); wt,  $n = 8$ ; Low<sub>OXPHOS</sub>,  $n = 8$ .
- Data information: Data are the mean  $\pm$  SEM of indicated ( $n$ ) mice; \* $P < 0.05$  when compared to wt by Student's  $t$ -test.

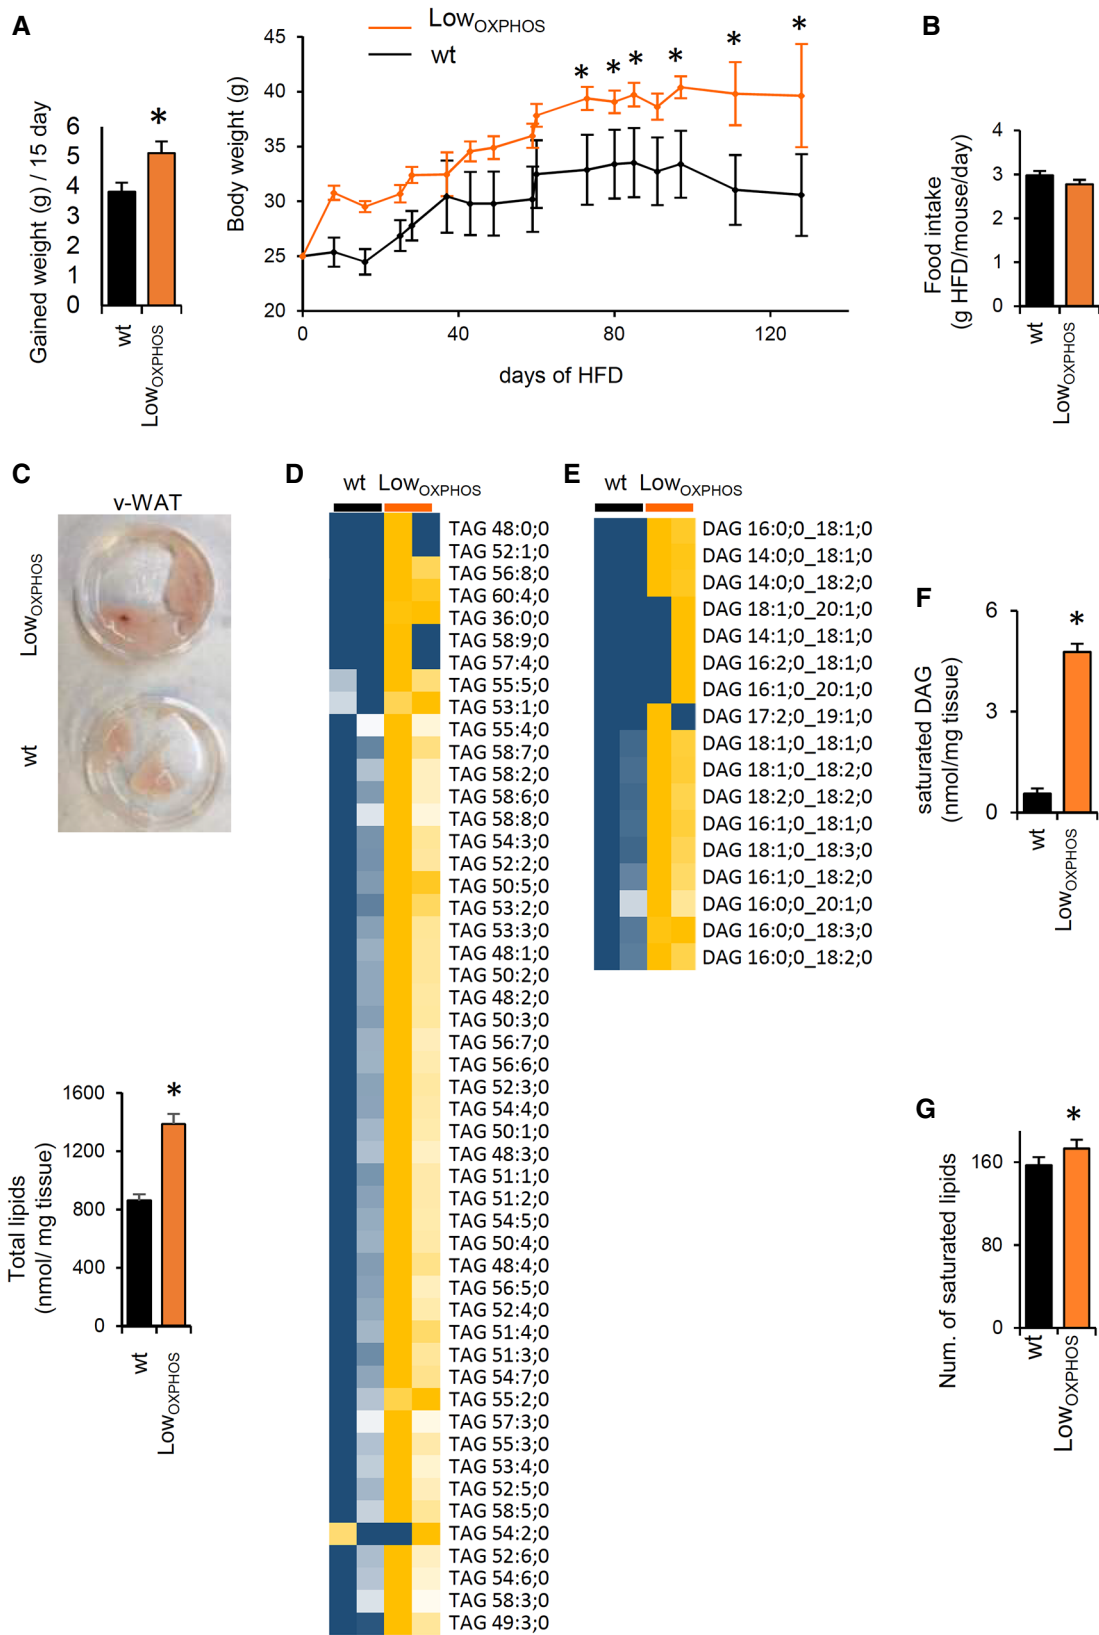

Figure EV4.

**Figure EV5. Edaravone treatment ameliorates the Skm mitochondrial dysfunctions (related to Figs 4, 5 and 7).**

- A NADP/NADPH levels in Skm extracts from wt ( $n = 8$ ) and Low<sub>OXPHOS</sub> ( $n = 8$ ) animals.
- B HFD/chow and Low<sub>OXPHOS</sub>/wt iTRAQ ratios of Skm proteins from OXPHOS system (wt,  $n = 10-12$ ; Low<sub>OXPHOS</sub>,  $n = 10-12$ ). Higher intensities of red or blue color represent higher or lower expression ratios, respectively. HFD induced the downregulation of the majority of OXPHOS complex subunits.
- C Representative WB of Skm OXPHOS system proteins in mice fed with chow or HFD. Two samples per condition are shown. Each sample contains extracts from 3 mice. NDUFA9 (CI), SDHA and B (CII), ETF subunits (A) and (B), ETFDH, CoreII (CIII), subunit 1 (CIV),  $\beta$ F1(CV), and hATPIF1 immunoblots are shown. Tubulin is provided as a loading control. Histograms show the quantification of specific protein expression (wt,  $n = 6$ ; Low<sub>OXPHOS</sub>,  $n = 6$ ; wt + HFD,  $n = 6$ ; Low<sub>OXPHOS</sub> + HFD,  $n = 6$ ).
- D Enzymatic activity of respiratory complex CI in Skm isolated mitochondria from wt and Low<sub>OXPHOS</sub> mice fed with chow or HFD (wt,  $n = 4$ ; Low<sub>OXPHOS</sub>,  $n = 4$ ; wt + HFD,  $n = 4$ ; Low<sub>OXPHOS</sub> + HFD,  $n = 4$ ).
- E Representative images of hindlimb muscles of mice treated with edaravone (wt + edaravone,  $n = 4$ ; Low<sub>OXPHOS</sub> + edaravone,  $n = 4$ ).
- F Plasma BCAA levels in wt and Low<sub>OXPHOS</sub> mice treated or not with edaravone (wt,  $n = 4$ ; Low<sub>OXPHOS</sub>,  $n = 4$ ; wt + edaravone,  $n = 4$ ; Low<sub>OXPHOS</sub> + edaravone,  $n = 4$ ).
- G <sup>14</sup>C(u)-leucine uptake in myocytes expressing ATPIF1<sub>H49K</sub> treated or not with edaravone. Data are the mean  $\pm$  SEM of  $n = 3$  experiments, 6 replicas/condition.
- H Food intake (g HFD/mouse/day) in wt and LowOXPHOS animals treated or not with edaravone (wt,  $n = 5$ ; wt + edaravone,  $n = 5$ ). No differences were observed.

Data information: Data are the mean  $\pm$  SEM of indicated ( $n$ ) mice. \* $P < 0.05$  when compared to wt; # $P < 0.05$  when compared to ATPIF1<sub>H49K</sub> by ANOVA and Student's  $t$ -test.

Source data are available online for this figure.



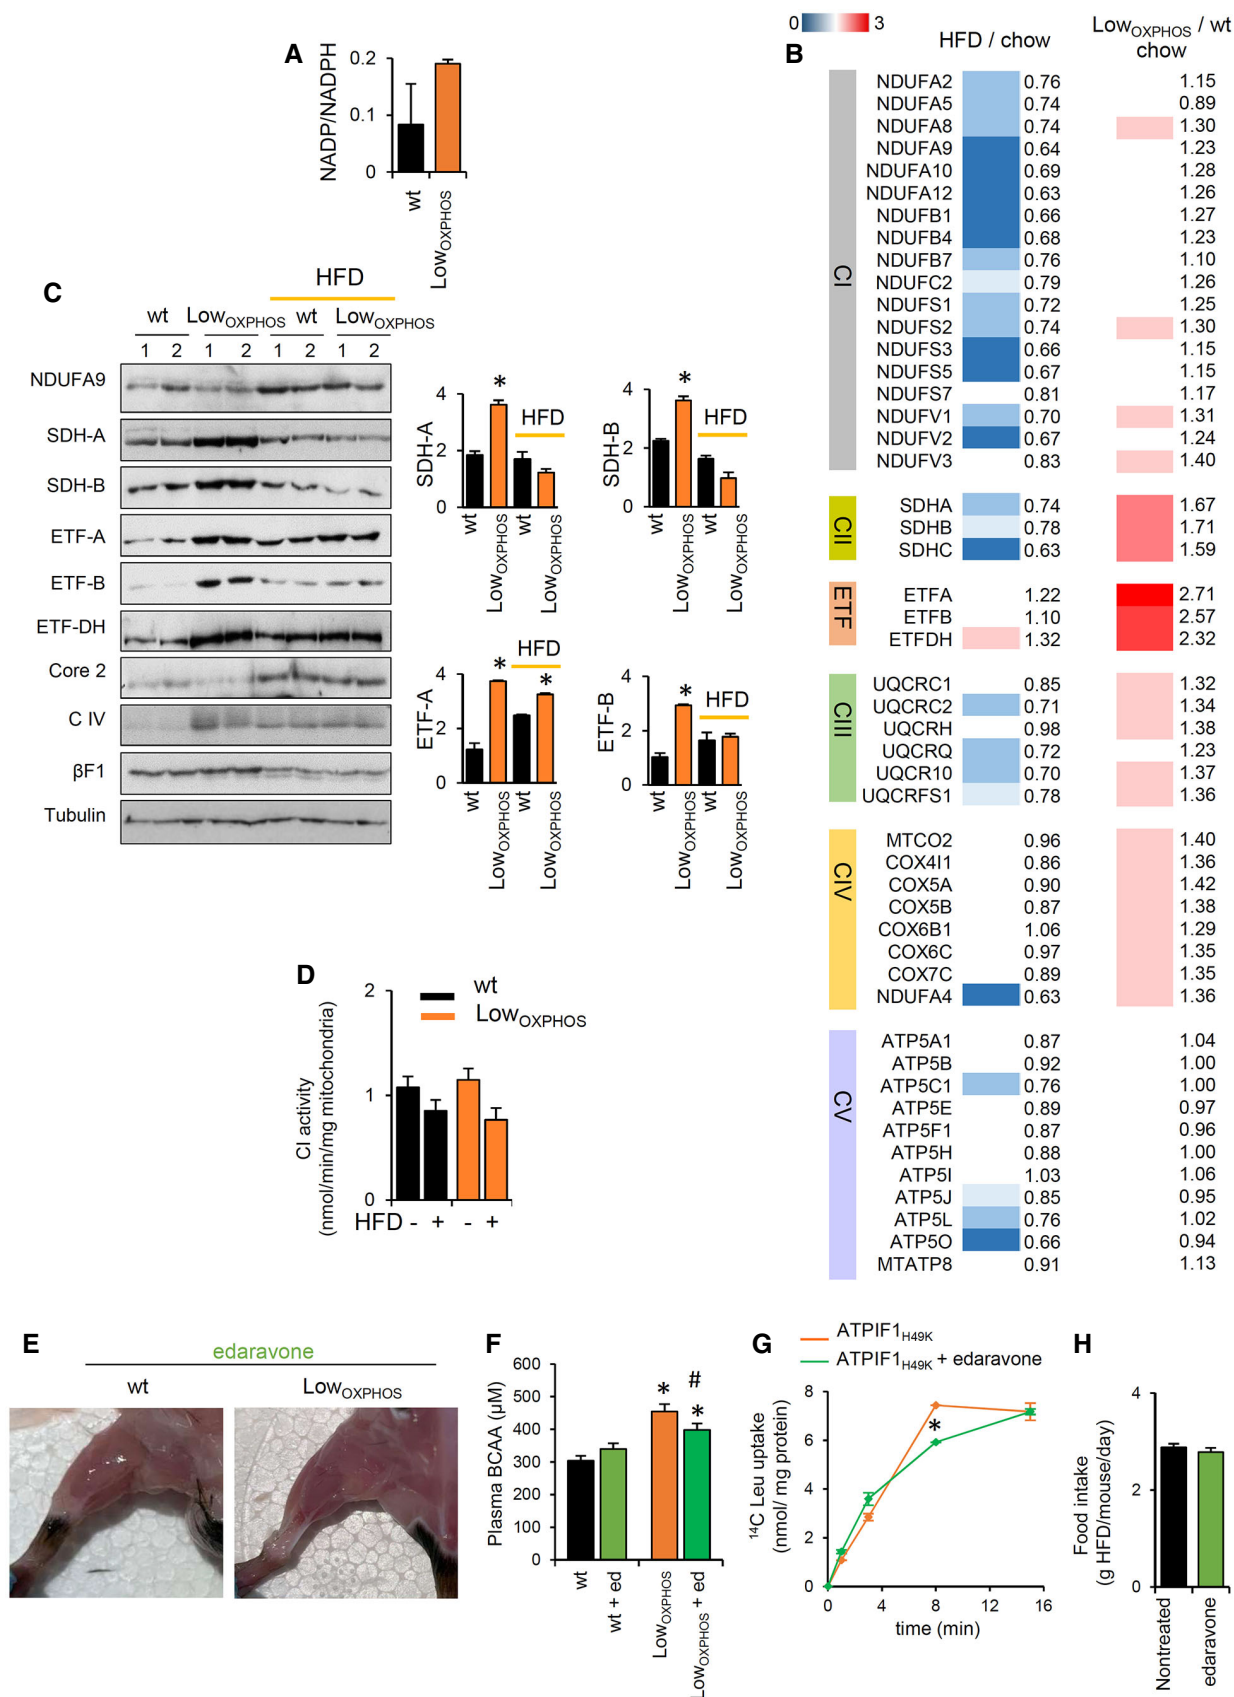

Figure EV5.
