# Supplementary material for: Dysfunctional oxidative phosphorylation shunts branched‐chain amino acid catabolism onto lipogenesis in skeletal muscle
Source: PubMed Central journal article supplement (PMC7360968; doi:10.15252/embj.2019103812), 2020-06-03
Supplement: EMBJ-39-e103812-s005.pdf [file EMBJ-39-e103812-s005.pdf]

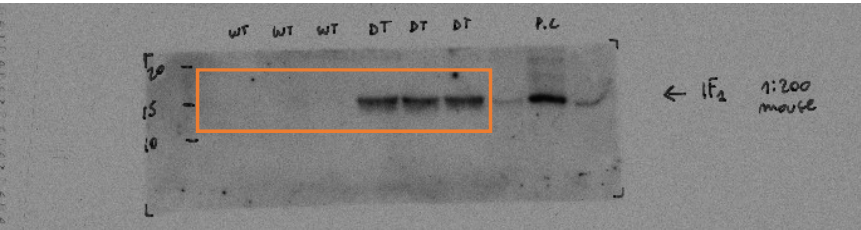

- **Figure 1B**
- Ab: human ATPIF1
- Date: 1/03/2018

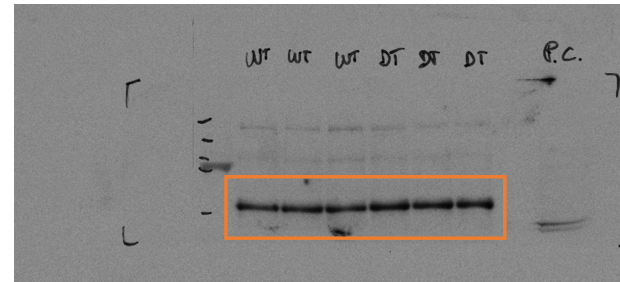

- **Figure 1B**
- Ab: HSP60
- Date: 16/03/2018

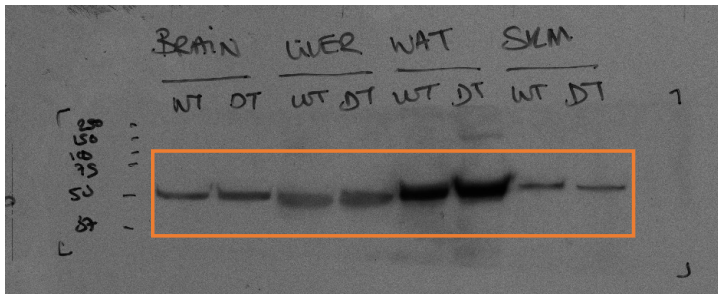

- **Figure 1D**
- Ac: α-tubulin
- Date: 19/12/2019

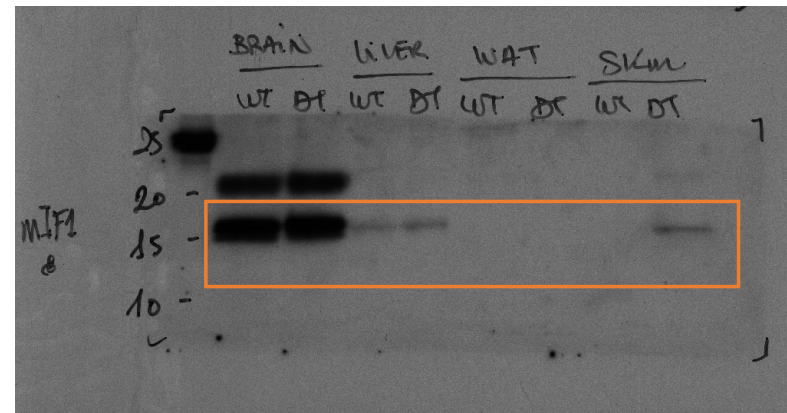

- **Figure 1D**
- Ac: mouse+ human ATPIF1
- Date: 19/12/2019

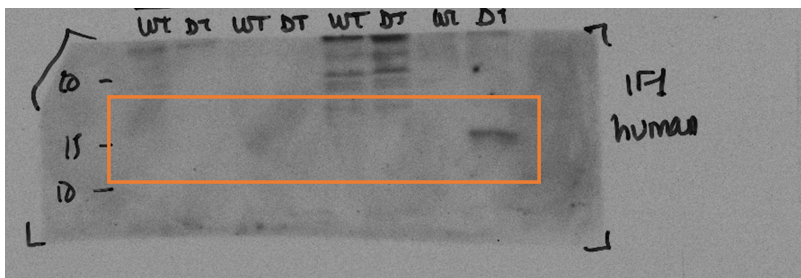

- **Figure 1D**
- Ab: human ATPIF1
- Date: 19/12/2019

Wt= wt  
 ATPIF1<sub>H49K</sub>= DT
