# Supplementary material for: Dysfunctional oxidative phosphorylation shunts branched‐chain amino acid catabolism onto lipogenesis in skeletal muscle
Source: PubMed Central journal article supplement (PMC7360968; doi:10.15252/embj.2019103812), 2020-06-03
Supplement: EMBJ-39-e103812-s006.pdf [file EMBJ-39-e103812-s006.pdf]

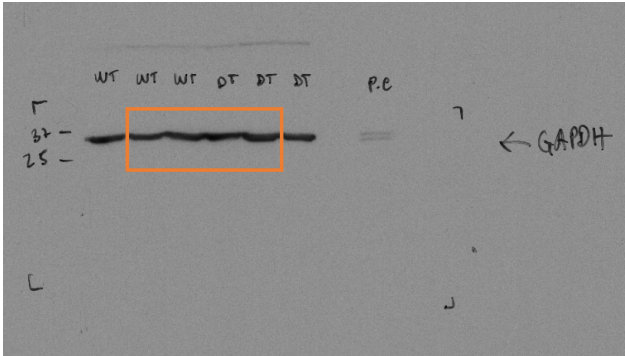

- **Figure 2F**
- Ab: GAPDH
- Date: 18/06/2018

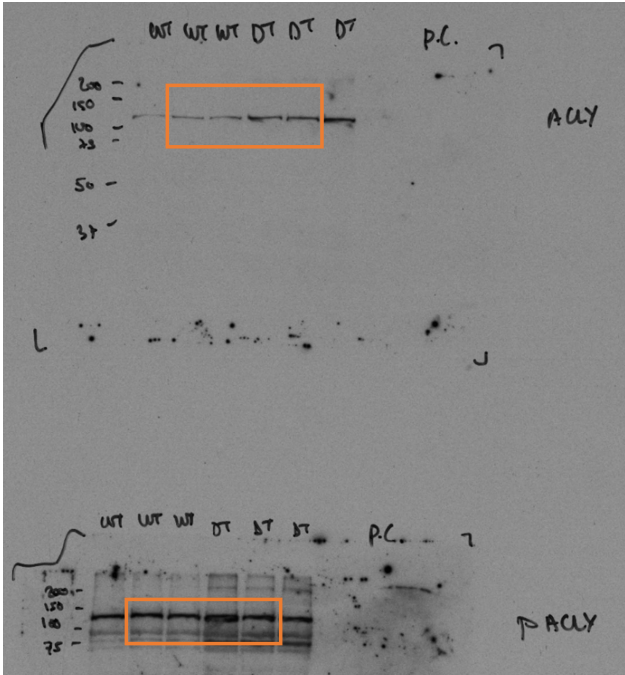

- **Figure 2F**
- Ab: ACLY,  
pACLY
- Date: 11/12/2018

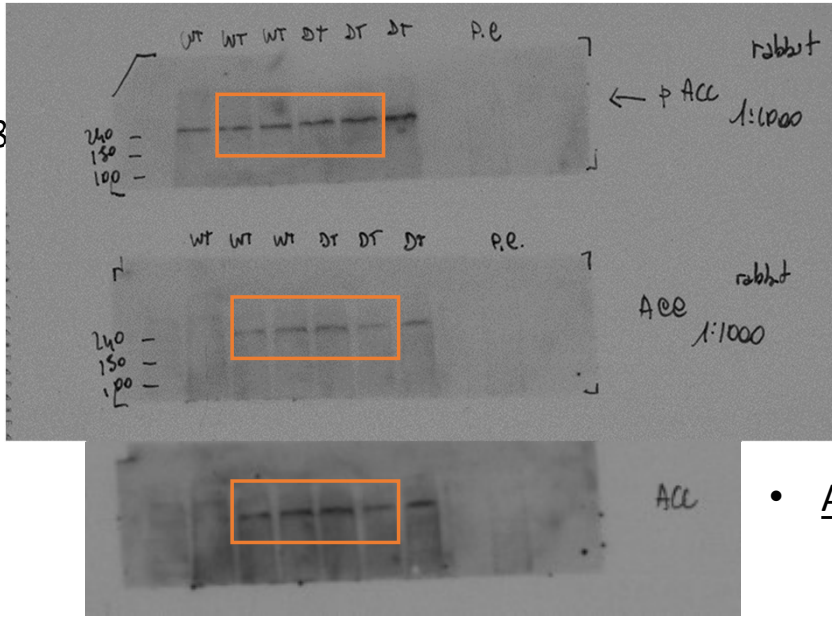

- **Figure 2F**
- Ab: pACAC,  
ACAC
- Date: 12/03/2018
- ACAC, high exposure

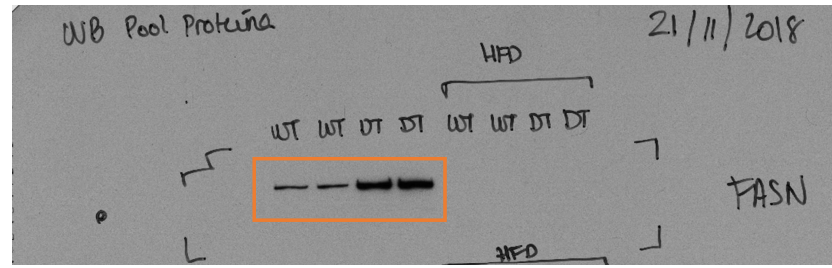

- **Figure 2F**
- Ab: FASN
- Date: 26/11/2018

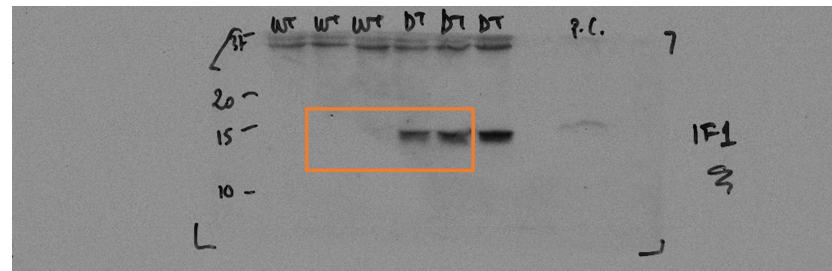

- **Figure 2F**
- Ab: hATPIF1
- Date: 09/08/2018

Wt= wt  
ATPIF1<sub>H49K</sub>= DT

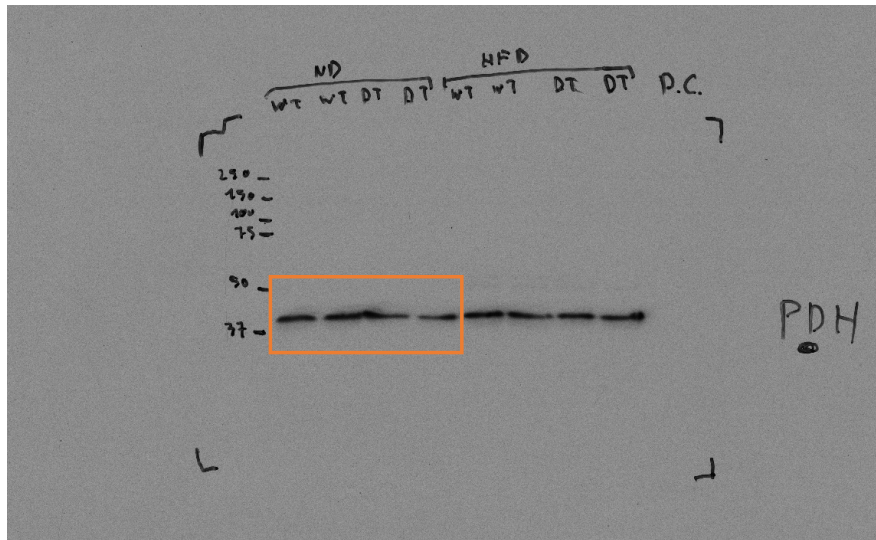

- **Figure 2M**
- Ab: pPDH
- Fecha: 23/07/2019

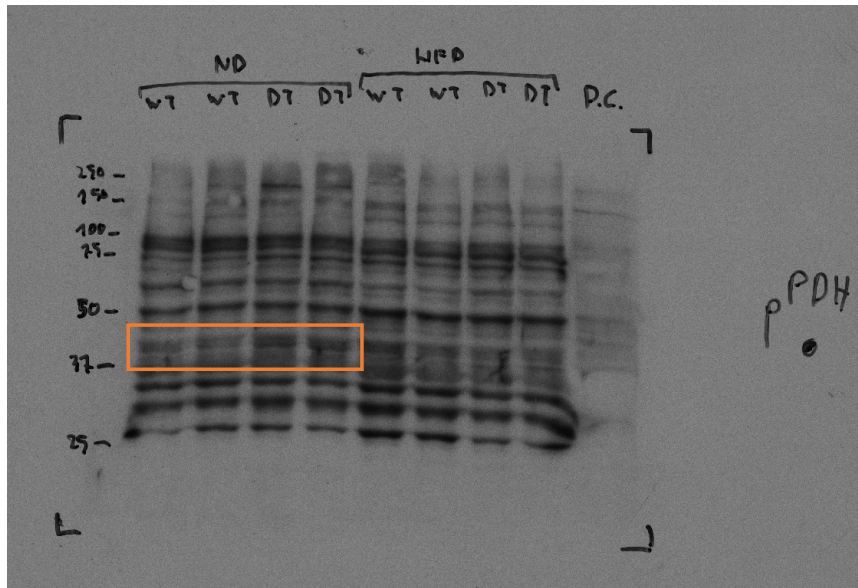

- **Figure 2M**
- Ab: PDH
- Fecha: 23/07/2019

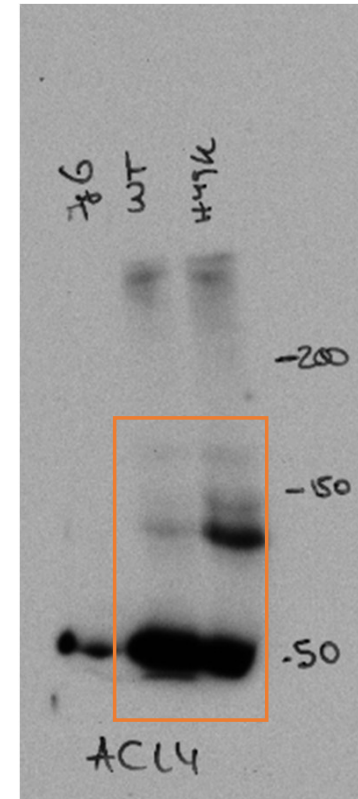

- **Figure 2G**
- IP: Acetyl-K
- WB: ACLY
- Date: 23/01/2020

Wt= wt  
 ATP1F1<sub>H49K</sub>= DT
