# Supplementary material for: Dysfunctional oxidative phosphorylation shunts branched‐chain amino acid catabolism onto lipogenesis in skeletal muscle
Source: PubMed Central journal article supplement (PMC7360968; doi:10.15252/embj.2019103812), 2020-06-03
Supplement: EMBJ-39-e103812-s007.pdf [file EMBJ-39-e103812-s007.pdf]

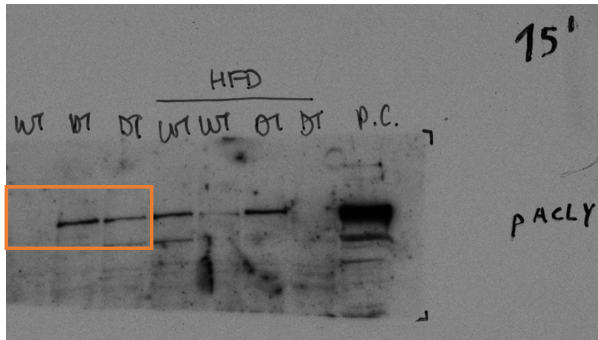

- **Figure 4C**
- Ab: pACLY
- Date: 09/04/2019

- **Figure 4C**
- Ab: human ATPIF1
- Date: 22/03/2019

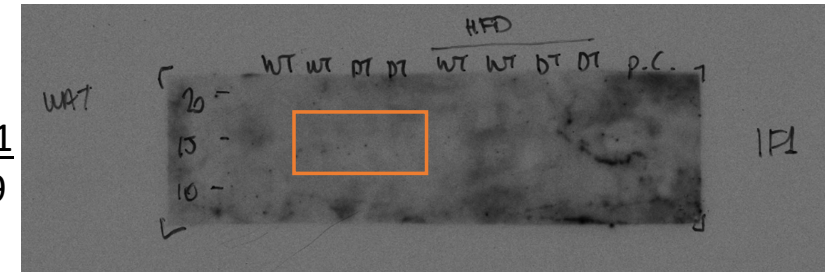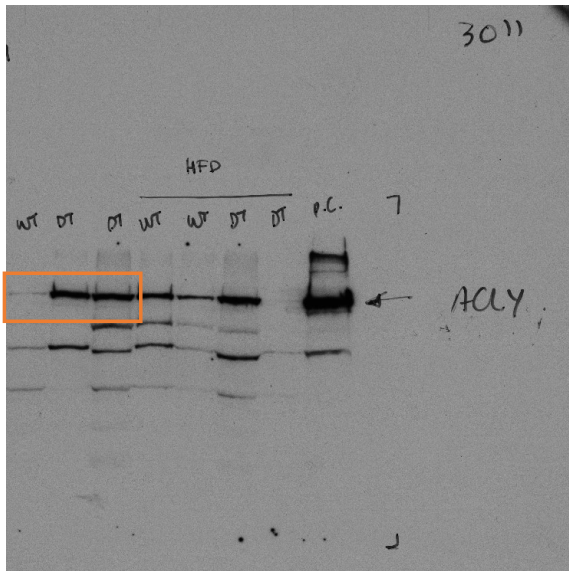

- **Figure 4C**
- Ab: ACLY
- Date: 27/03/2019

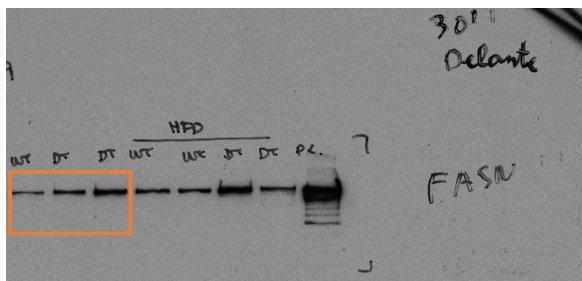

- **Figure 4C**
- Ab: FASN
- Date: 02/04/2019

Wt= wt  
 ATPIF1<sub>H49K</sub>= DT

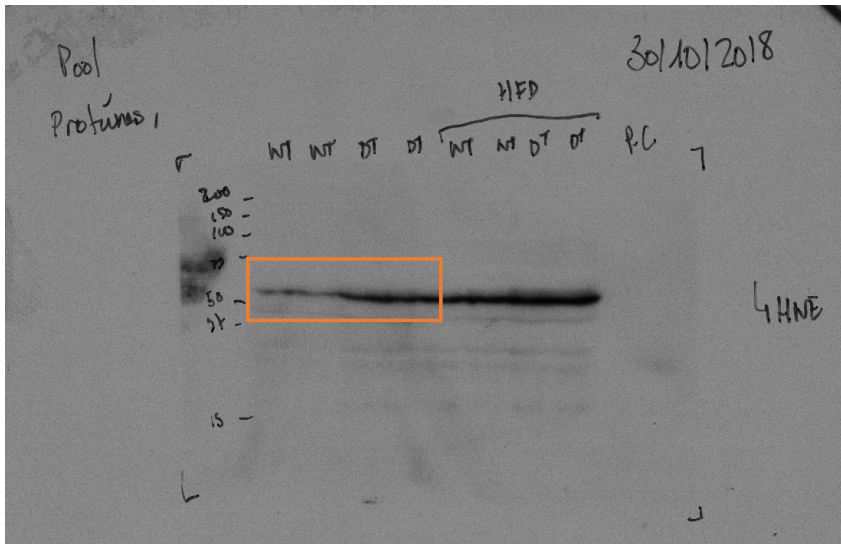

- **Figure 4J**
- Ab: 4HNE
- Date: 30/10/2019

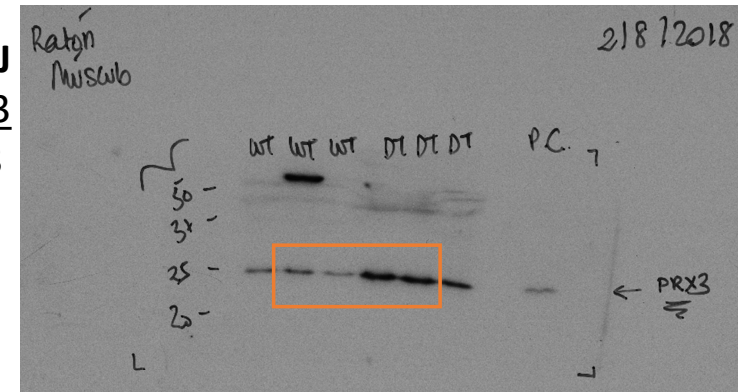

- **Figure 4J**
- Ab: PRX3
- Date: 02/08/2018

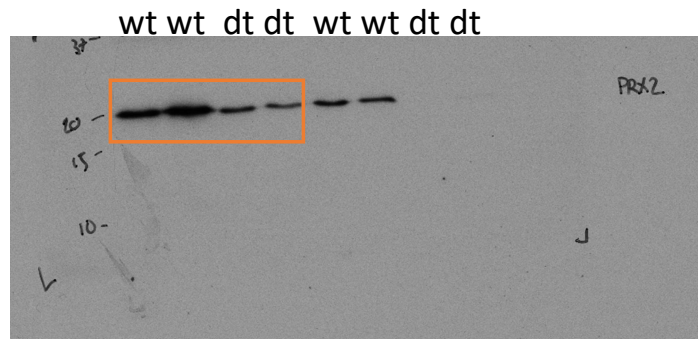

- **Figure 4J**
- Ab: PRX2
- Date: 30/10/2019

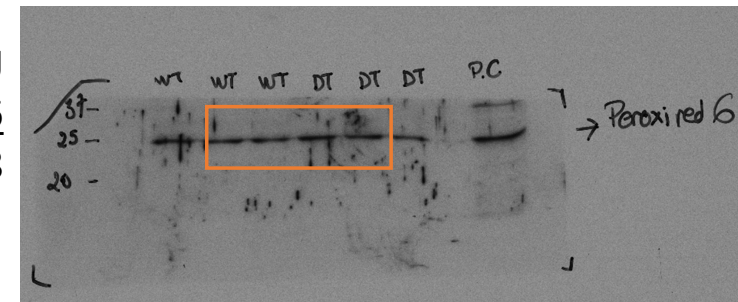

- **Figure 4J**
- Ab: PRX6
- Date: 16/03/2018

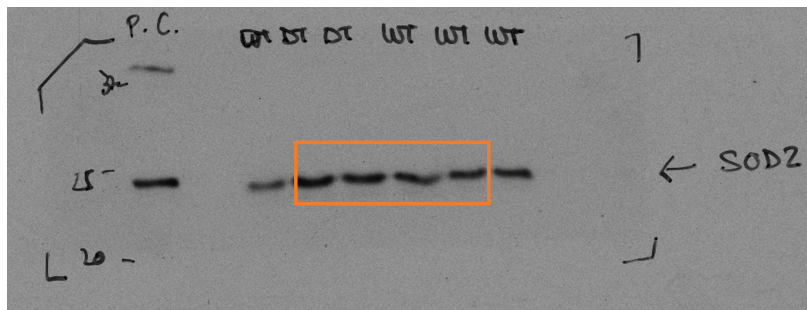

- **Figure 4J**
- Ab: SOD2
- Date: 04/05/2018

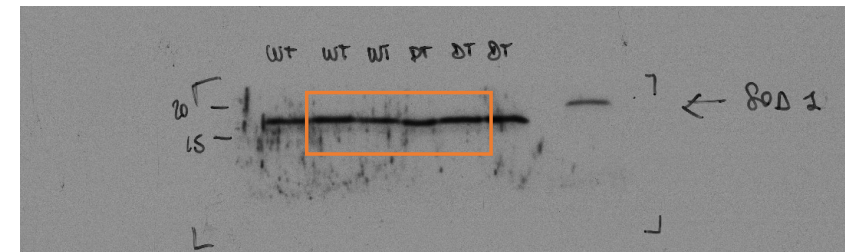

- **Figure 4J**
- Ab: SOD1
- Fecha: 5/07/2018

Wt= wt  
ATPIF1<sub>H49K</sub>= DT

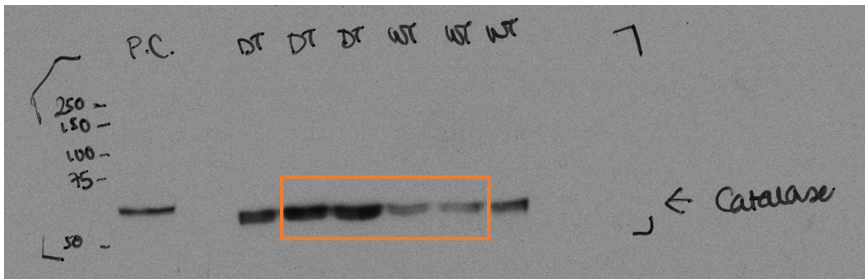

- **Figure 4J**
- Ab: CATALASE
- Date: 04/05/2018

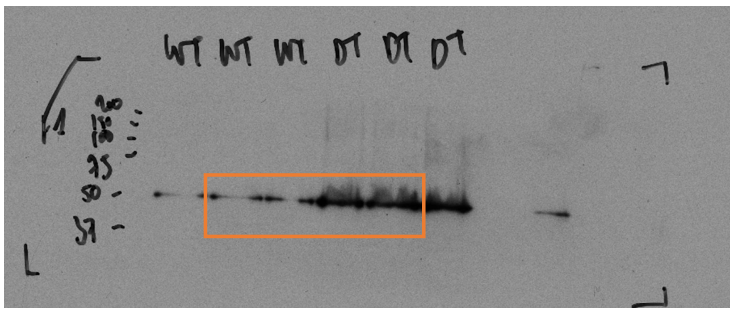

- **Figure 4J**
- Ab: GSR
- Date: 20/12/2018

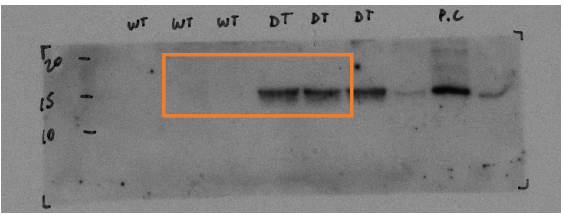

- **Figure 4J**
- Ab: hATPIF1
- Date: 01/03/2018

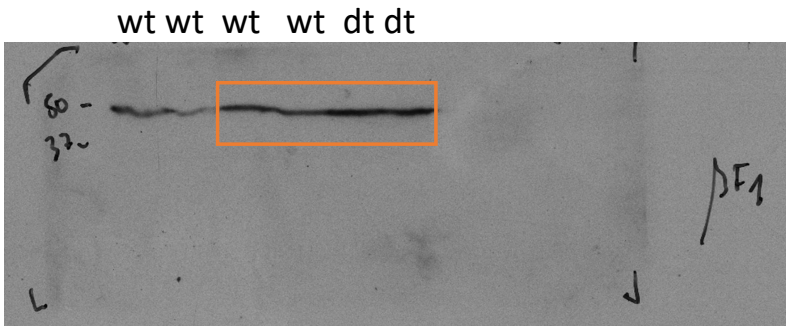

- **Figure 4J**
- Ab:  $\beta$ F1
- Date: 02/08/2018

Wt= wt  
 ATPIF1<sub>H49K</sub>= DT

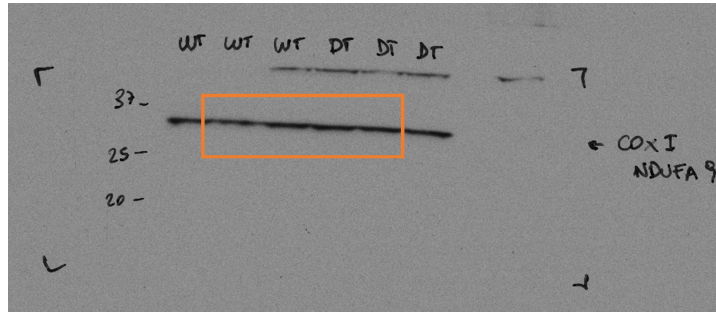

- **Figure 4K**
- Ab: NDUFA9
- Date: 16/03/2018

Wt= wt  
ATPIF1<sub>H49K</sub>= DT

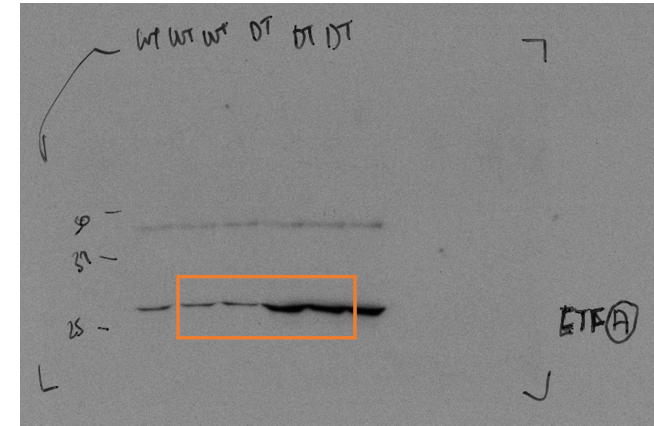

- **Figure 4K**
- Ab: ETFA
- Date: 12/12/2018

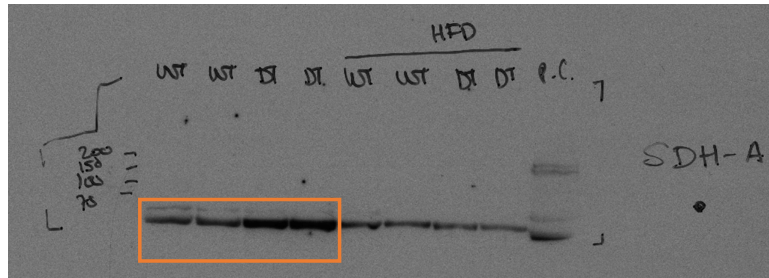

- **Figure 4K**
- Ab: SDHA
- Date: 16/01/2019

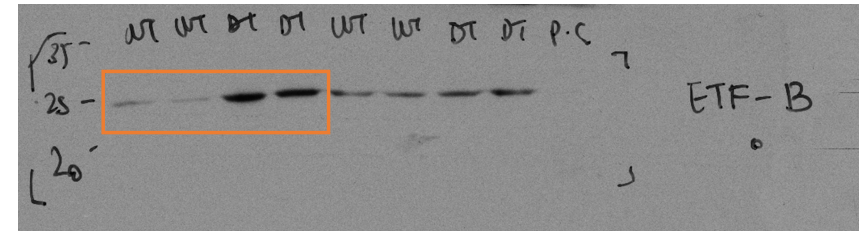

- **Figure 4K**
- Ab: ETFB
- Date: 16/04/2019

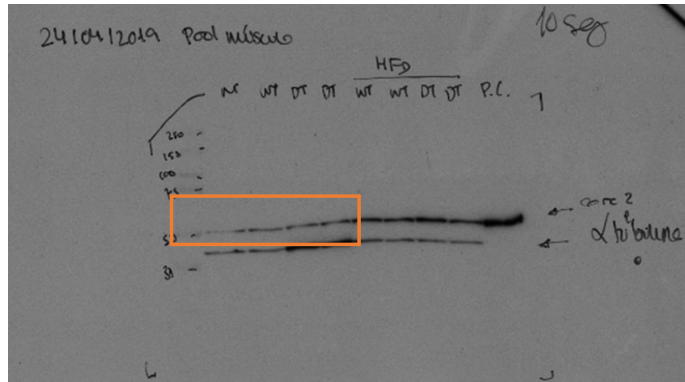

- **Figure 4K**
- Ab: Core II
- Date: 24/04/2019

- **Figure 4K**
- Ab: ETF-DH
- Date: 09/07/2019

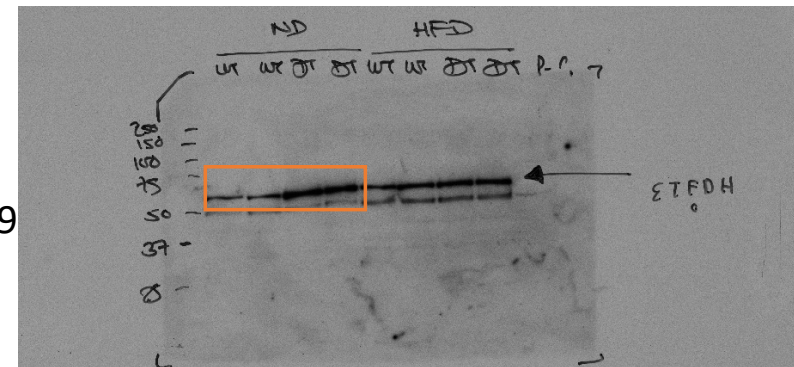

- **Figure 4K**
- Ab: SDHB
- Date: 24/04/2019

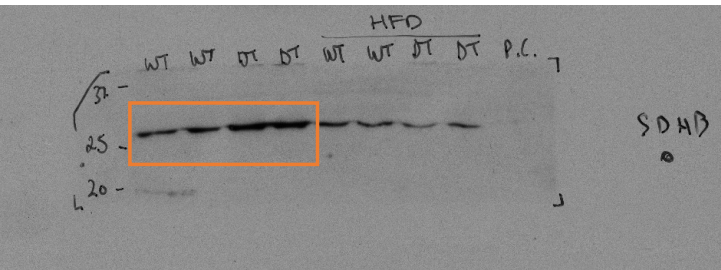

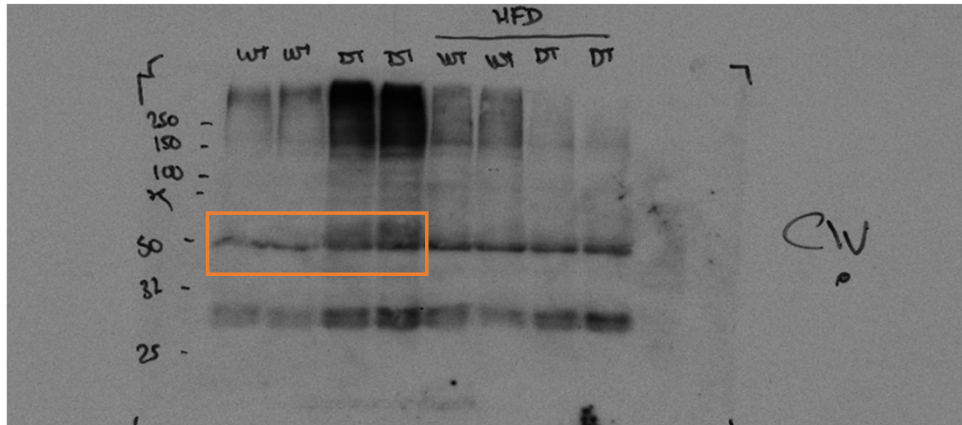

- **Figure 4K**
- Ab: CIV
- Date: 14/04/2019

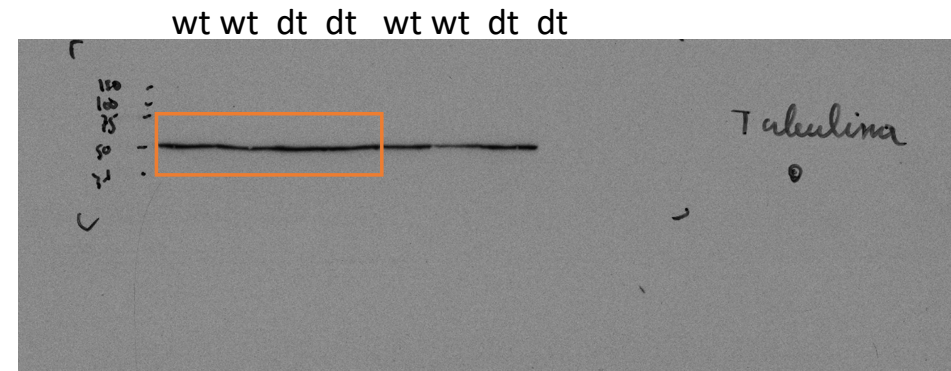

- **Figure 4K**
- Ab: tubulina
- Date: 18/04/2018

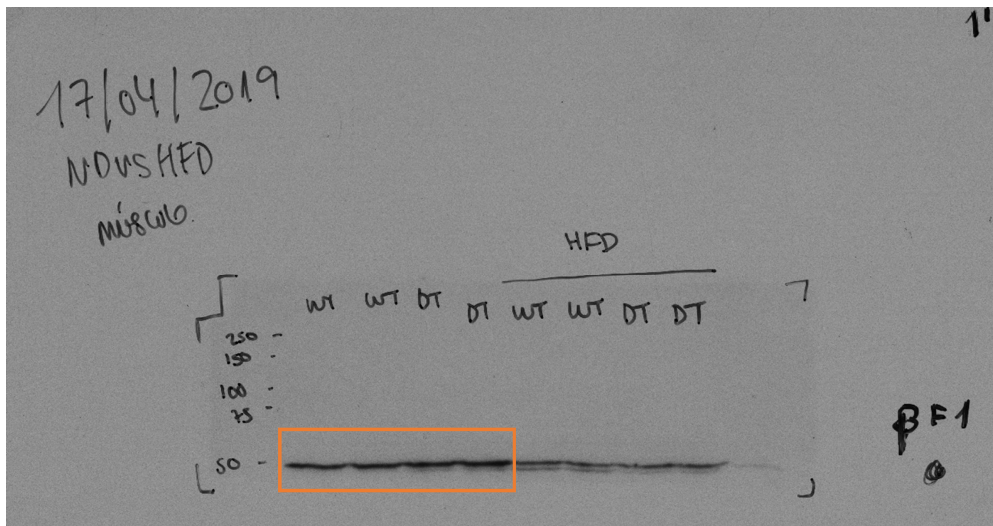

- **Figure 4K**
- Ab: BF1
- Date: 17/04/2018

Wt= wt  
ATPIF1<sub>H49K</sub>= DT
