# Supplementary material for: Dysfunctional oxidative phosphorylation shunts branched‐chain amino acid catabolism onto lipogenesis in skeletal muscle
Source: PubMed Central journal article supplement (PMC7360968; doi:10.15252/embj.2019103812), 2020-06-03
Supplement: EMBJ-39-e103812-s008.pdf [file EMBJ-39-e103812-s008.pdf]

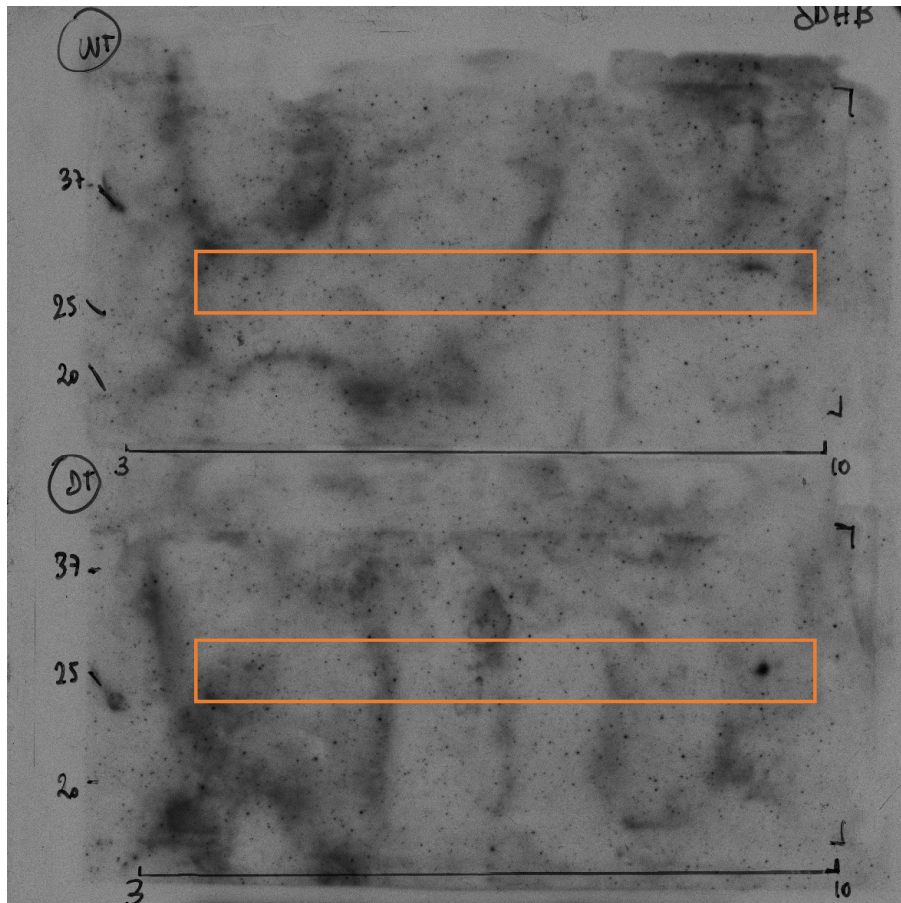

- **Figure 5C**
- Ab: SDH-B
- Date: 03/06/2019

Wt= wt  
 ATP1F1<sub>H49K</sub>= DT

- **Figure 5D**
- Ab: SDH-A
- Date: 03/06/2019

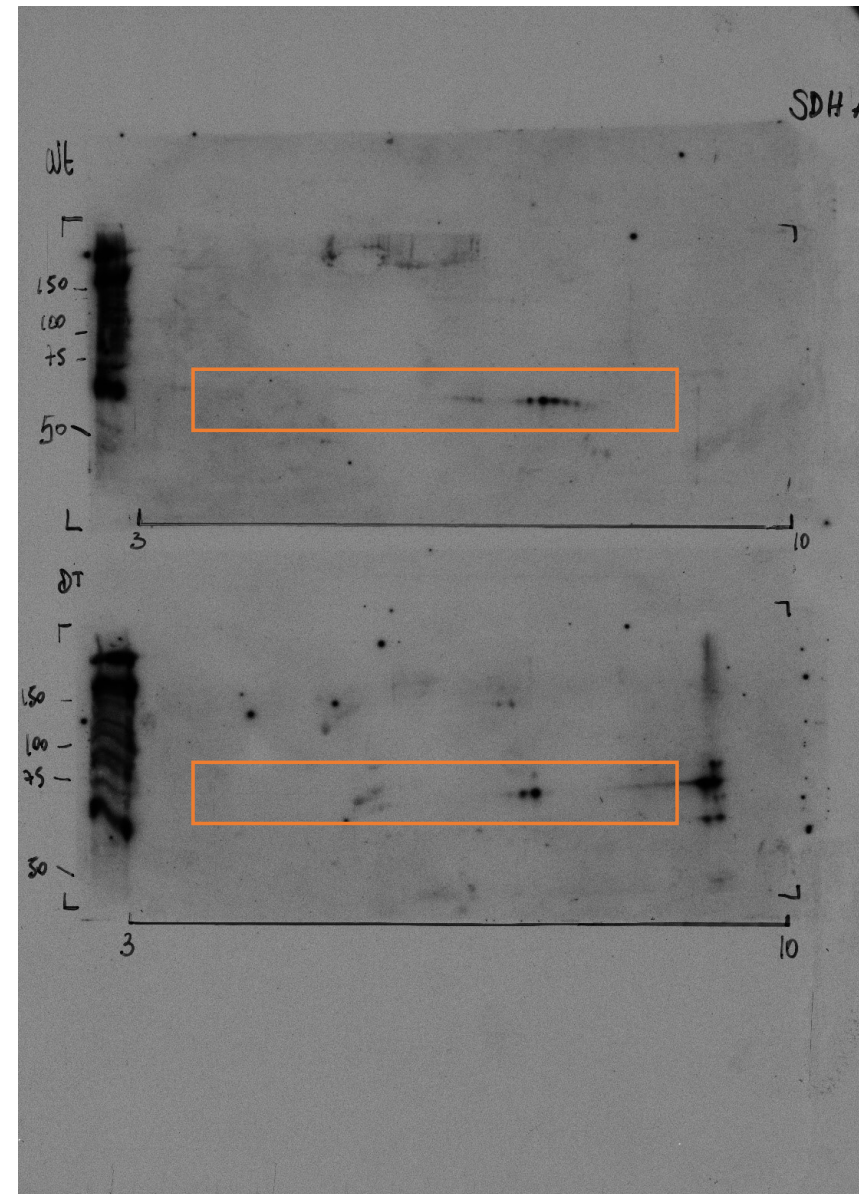

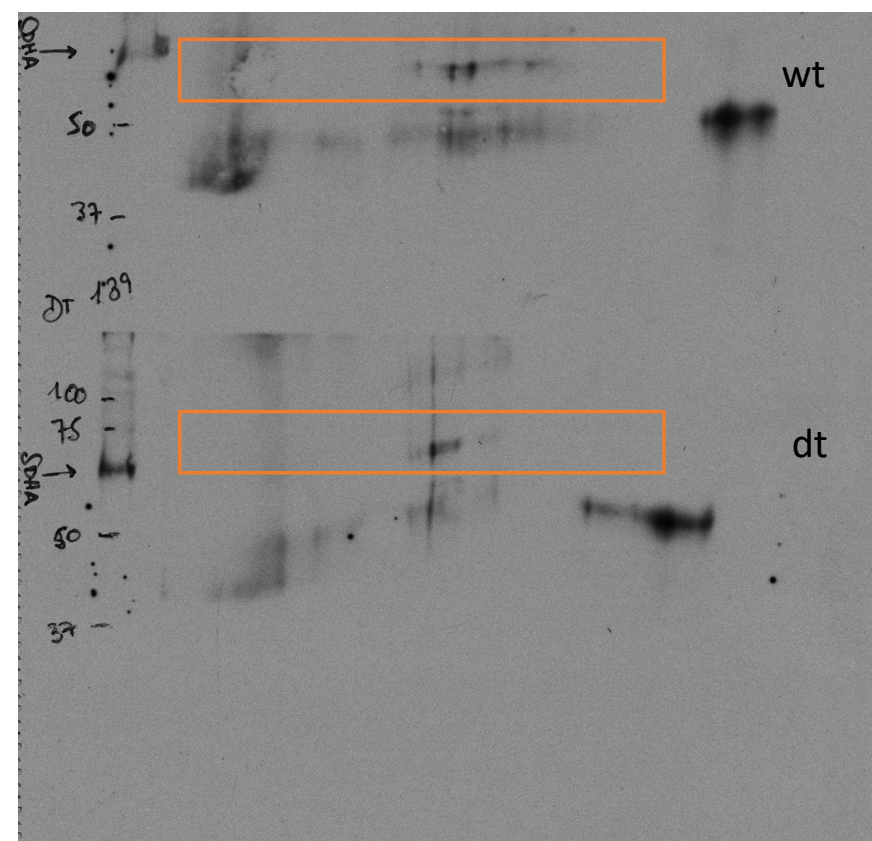

- **Figure 5E**
- Ab: SDH-A
- Date: 03/06/2019

Wt= wt  
 ATP1F1<sub>H49K</sub>= DT

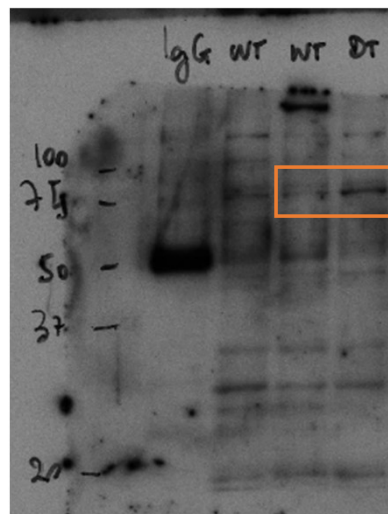

- **Figure 5F (2)**
- IP Acetyl-K, blot SDH-A
- Date: 26/08/2019

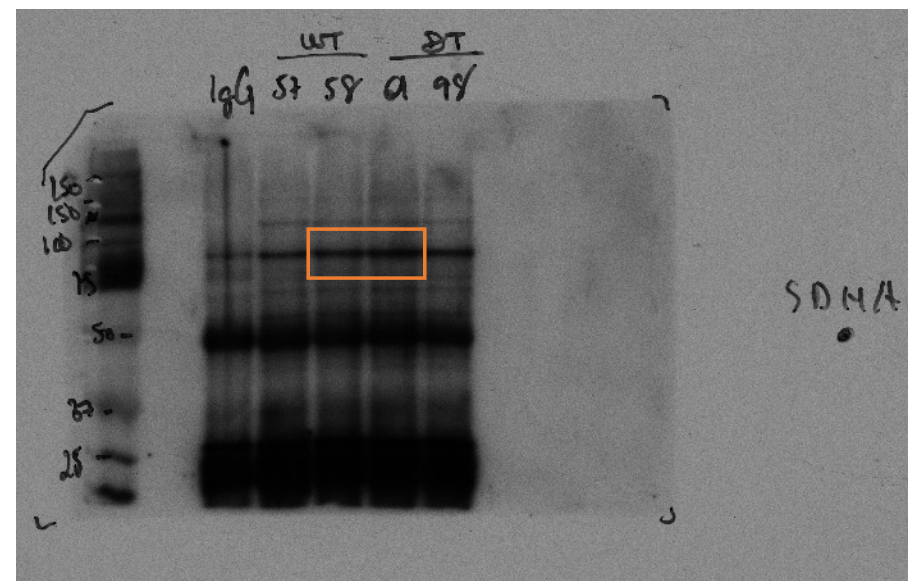

- **Figure 5F (3)**
- Ac: IP SDH-A, blot SDHA
- Date: 18/06/2019

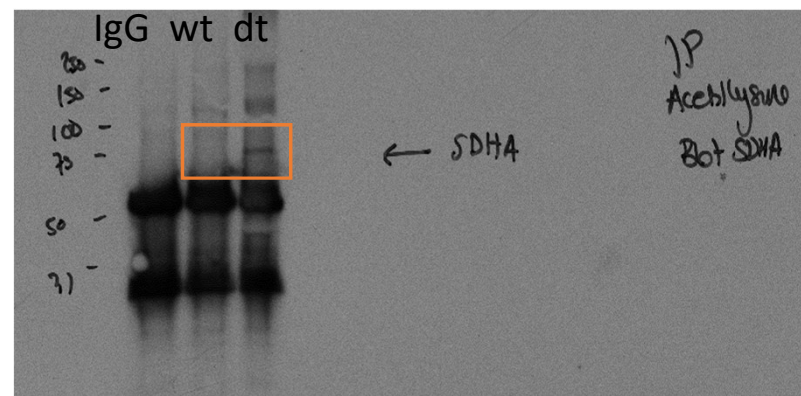

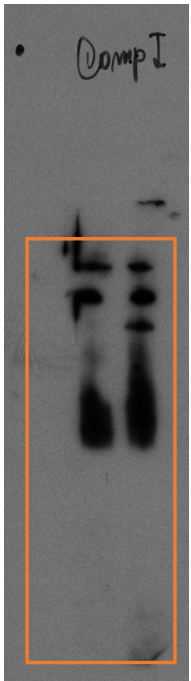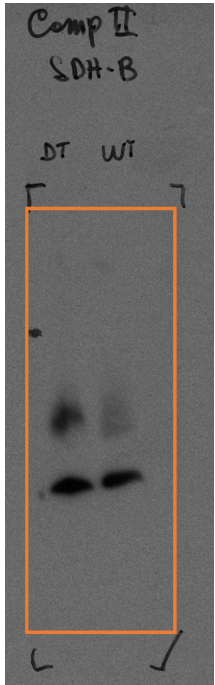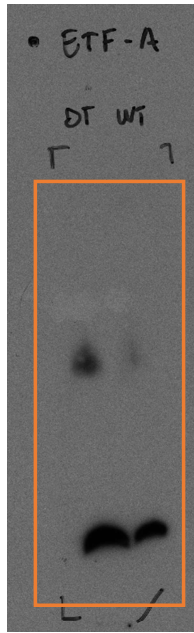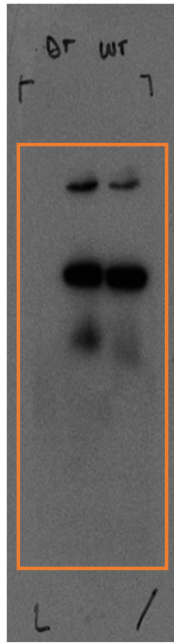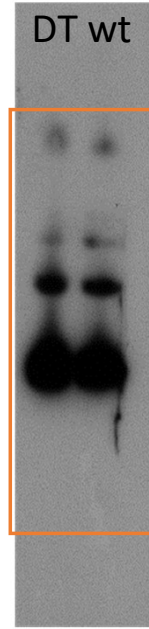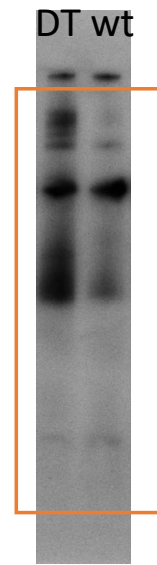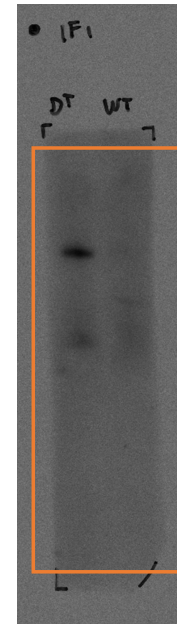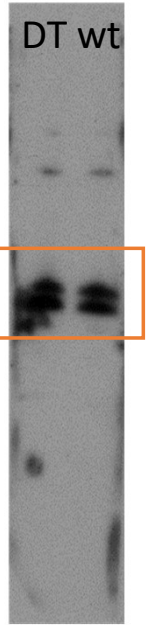

- **Figure 5K**
- Ab: CI
- 21/01/2019

- **Figure 5K**
- Ab: CII (SDH-A)
- 21/01/2019

- **Figure 5K**
- Ab: ETFA
- 21/01/2019

- **Figure 5K**
- Ab: Core II (CIII)
- 21/01/2019

- **Figure 5K**
- Ab: CIV
- 21/01/2019

- **Figure 5K**
- Ab: BF1
- 29/01/2019

- **Figure 5K**
- Ab: IF1
- 29/01/2019

- **Figure 5K**
- Ab: VDAC
- 29/01/2019

Wt= wt  
 ATP1F1<sub>H49K</sub>= DT

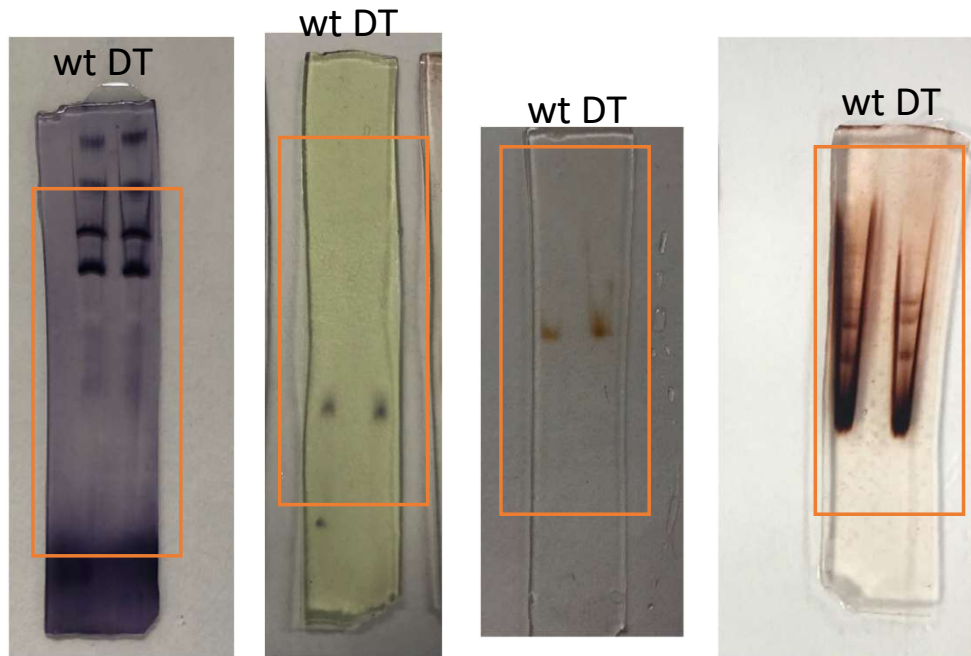

- **Figure 5K**
- Complex I activity
- 30/01/2019
- **Figure 5K**
- Complex II activity
- 30/01/2019
- **Figure 5K**
- Complex III activity
- 30/01/2019
- **Figure 5K**
- Complex IV activity
- 30/01/2019

Wt= wt  
 ATPIF1<sub>H49K</sub>= DT
