# Supplementary material for: Dysfunctional oxidative phosphorylation shunts branched‐chain amino acid catabolism onto lipogenesis in skeletal muscle
Source: PubMed Central journal article supplement (PMC7360968; doi:10.15252/embj.2019103812), 2020-06-03
Supplement: EMBJ-39-e103812-s009.pdf [file EMBJ-39-e103812-s009.pdf]

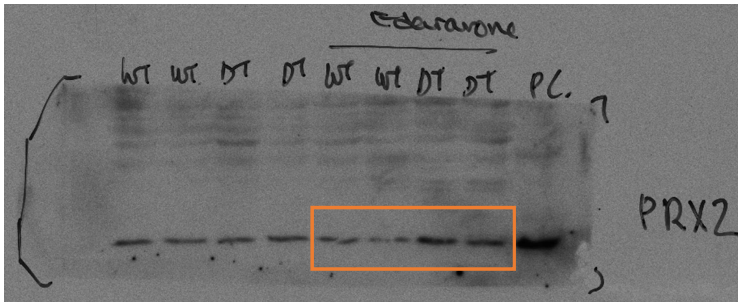

- **Figure 7B**
- Ab: PRX2
- Date: 12/02/2019

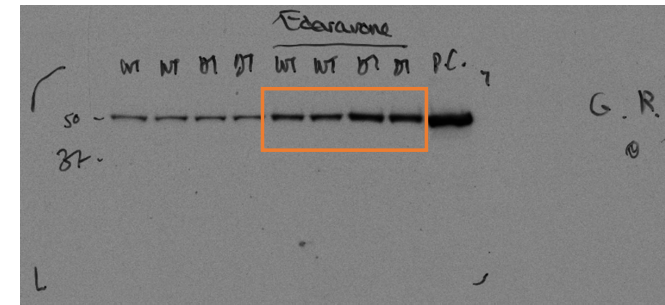

- **Figure 7B**
- Ab: GSR
- Date: 26/02/2019

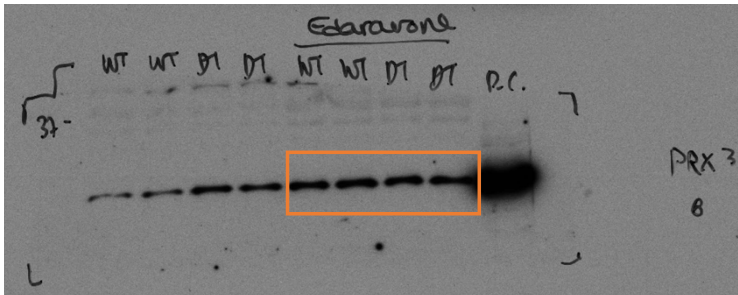

- **Figure 7B**
- Ab: PRX3
- Date: 26/02/2019

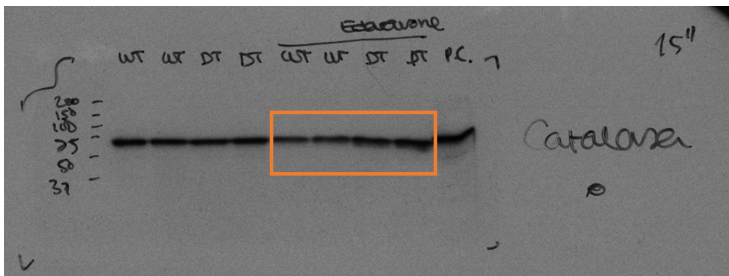

- **Figure 7B**
- Ab: CATALASE
- Date: 13/02/2019

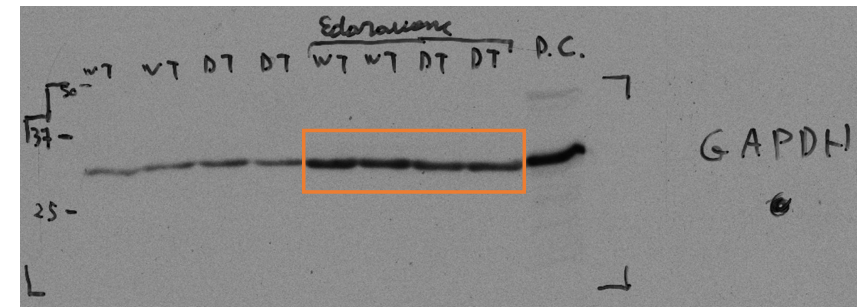

- **Figure 7B**
- Ab: GAPDH
- Date: 07/03/2019

Wt= wt  
 ATP1F1<sub>H49K</sub>= DT

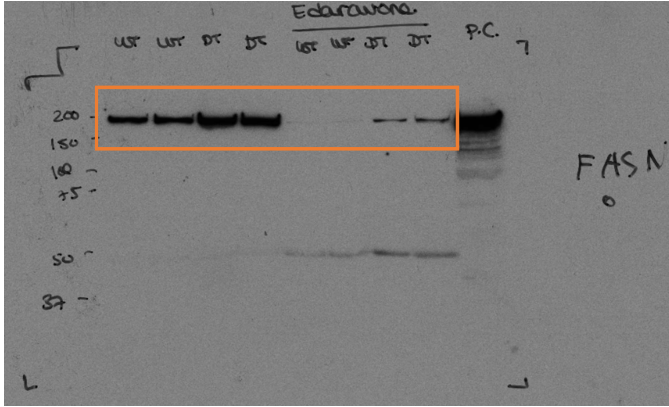

- **Figure 7D**
- Ab: FASN
- Date: 28/02/2019

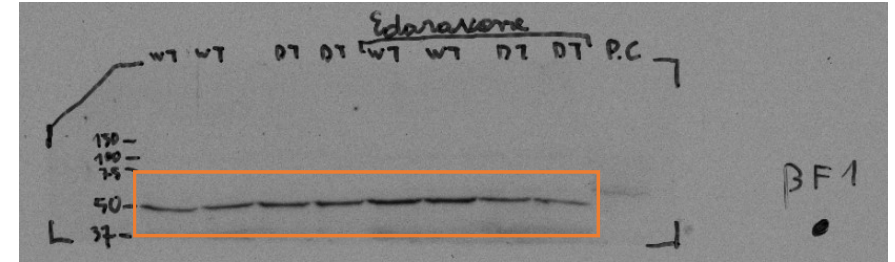

- **Figure 7D**
- Ab: BF1
- Date: 28/02/2019

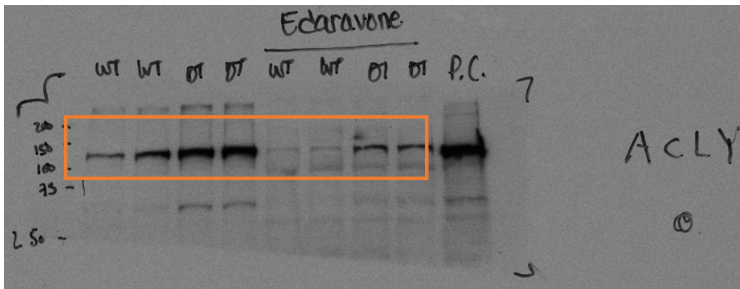

- **Figure 7D**
- Ab: ACLY
- Date: 26/02/2019

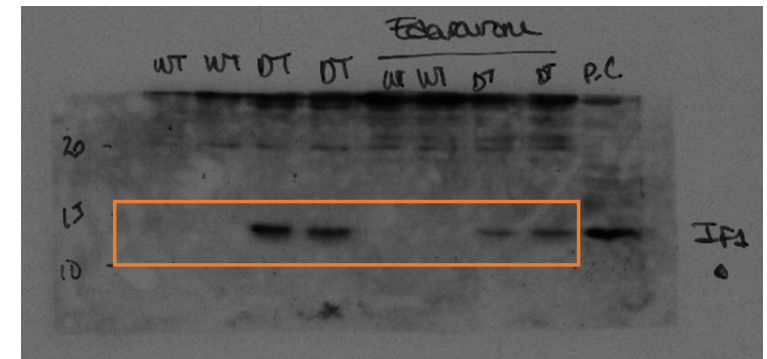

- **Figure 7D**
- Ab: human ATPIF1
- Date: 28/02/2019

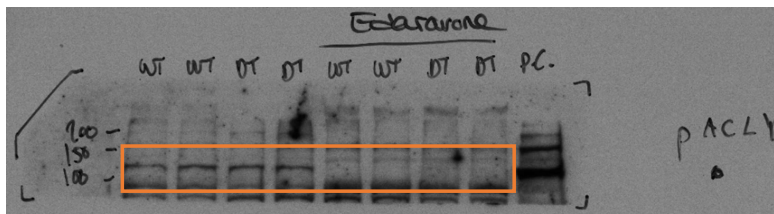

- **Figure 7D**
- Ab: pACLY
- Date: 26/02/2019

Wt= wt  
 ATPIF1<sub>H49K</sub>= DT

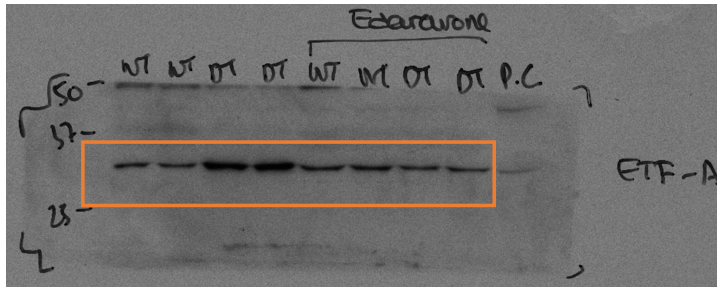

- **Figure 7E**
- Ab: ETF-A
- Date: 12/02/2019

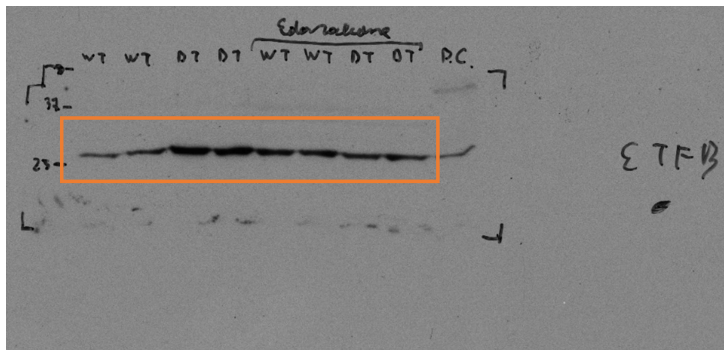

- **Figure 7C**
- Ab: ETF-B
- Date: 05/03/2019

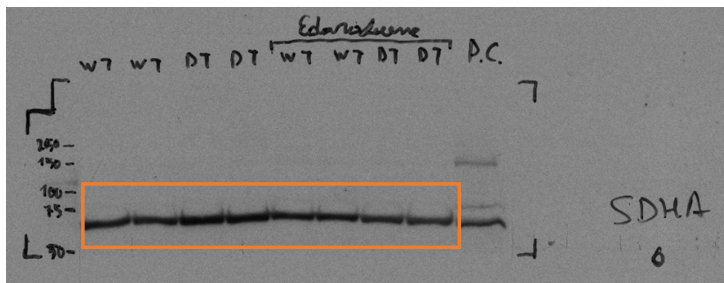

- **Figure 7C**
- Ab: SDH-A
- Date: 05/03/2019

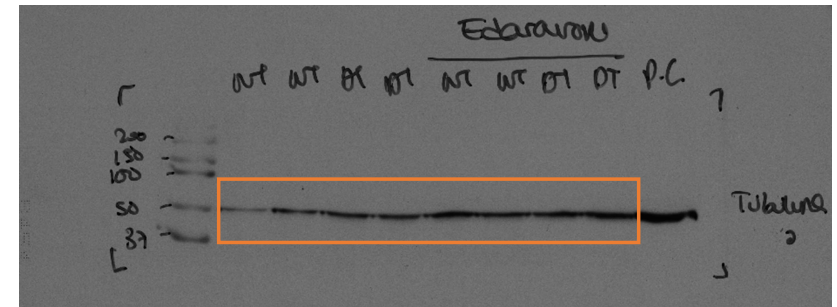

- **Figure 7C**
- Ab: Tubulin
- Date: 12/02/2019

Wt= wt  
 ATP1F1<sub>H49K</sub>= DT

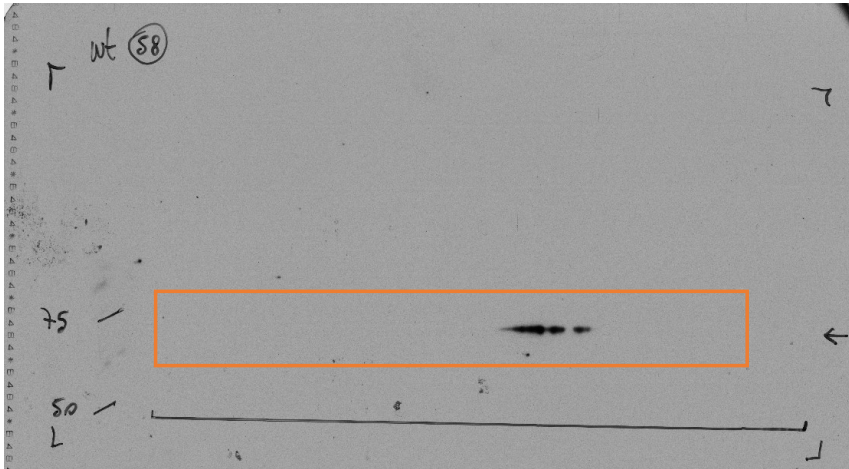

- **Figure 7F**
- Ab: SDHA
- Date: 21/02/2019

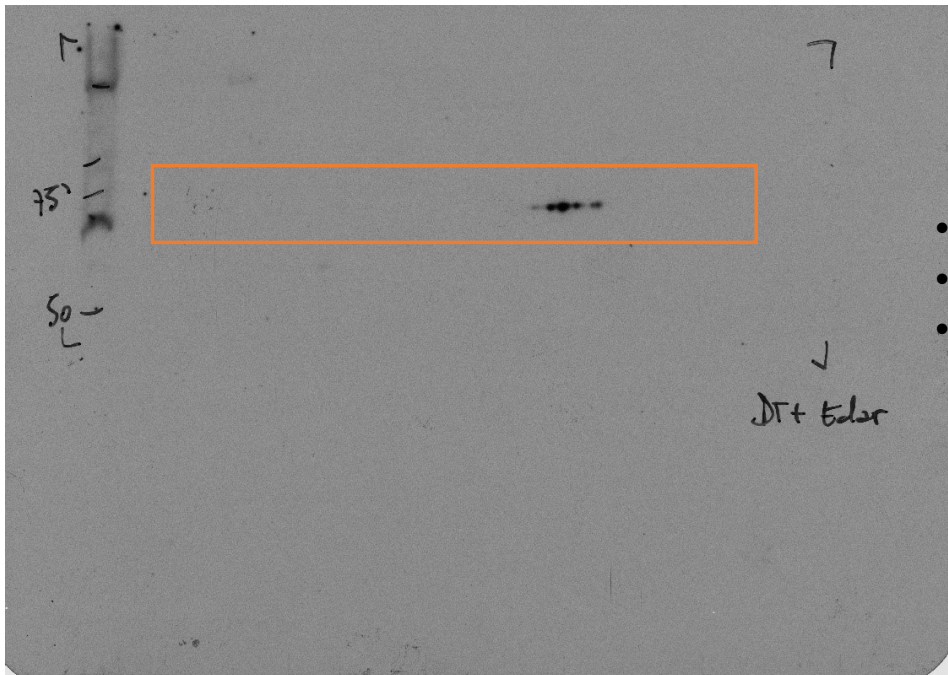

- **Figure 7F**
- Ab: SDHA
- Date: 05/03/2019

Wt= wt  
 ATP1F1<sub>H49K</sub> = DT

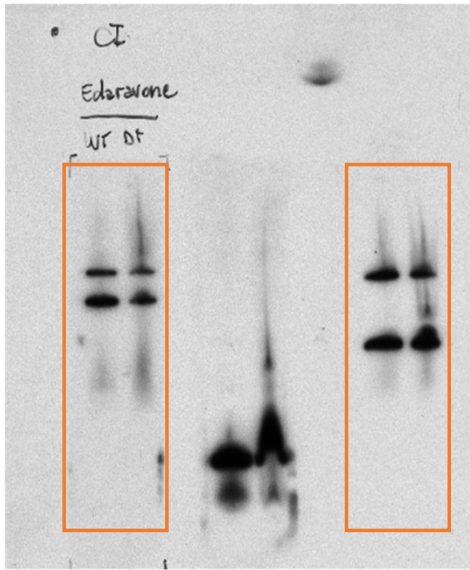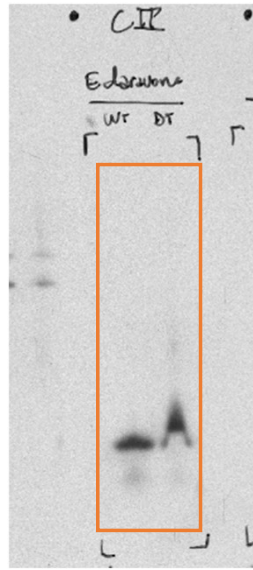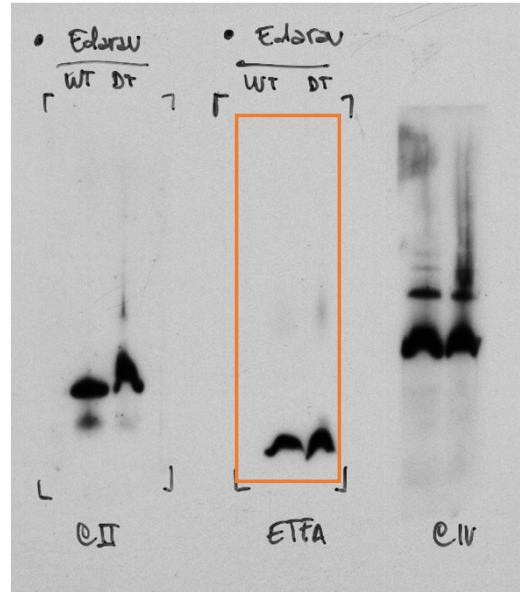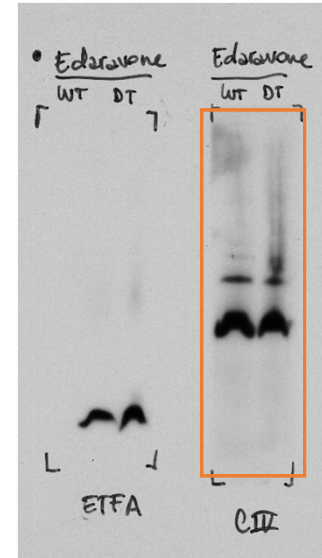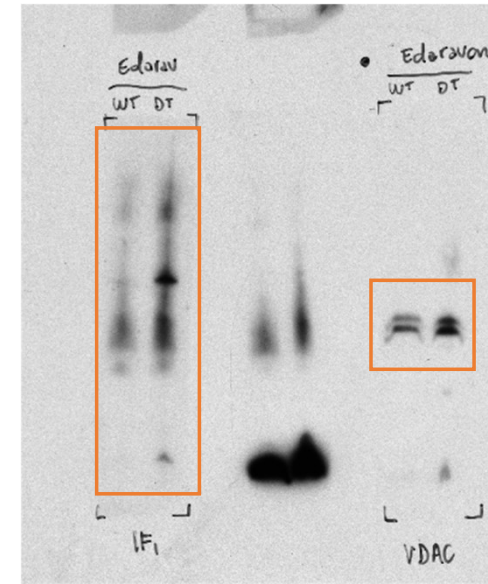

- **Figure 7G**
- Ab: CI
- 13/02/2019
- **Figure 7G**
- Ab: Core 2
- (CIII)
- 13/02/2019
- **Figure 7G**
- Ab: CII
- 13/02/2019

- **Figure 7G**
- Ab: ETFA
- 13/02/2019

- **Figure 7G**
- Ab: CIV
- 13/02/2019
- **Figure 7G**
- Ab: ATP1F1
- 13/02/2019
- **Figure 7G**
- Ab: VDAC
- 13/02/2019

Wt= wt  
ATPIF1<sub>H49K</sub>= DT
